# Supplementary material
Source: PubMed Central journal article supplement (PMC7409758)
Supplement: CJN.12201019SupplementaryData.pdf [file CJN.12201019SupplementaryData.pdf]

## SUPPLEMENTAL MATERIAL TABLE OF CONTENTS

Supplemental Table 1. Electronic search terms.

Supplemental Table 2. Characteristics of included studies.

Supplemental Table 3. Risk of bias assessments of all included trials.

Supplemental Table 4. Assessment of loop-specific (in closed loops of evidence) and overall inconsistency and heterogeneity.

Supplemental Table 5. Assessment of agreement between direct and indirect evidence using side-splitting approach for all outcomes. '

Supplemental Figure 1. Electronic searches in MEDLINE, Embase, and the Cochrane Central Register of Randomised Trials for trials on blood pressure lowering drugs in adults with kidney failure requiring dialysis.

Supplemental Figure 2. Domain-specific risk of bias assessment summary of included studies.

Supplemental Figure 3. Study limitations weighted by contribution of direct estimates to the network of blood pressure lowering drugs for systolic blood pressure outcome.

Supplemental Figure 4. Comparison-adjusted funnel plot of placebo-controlled trials (n=17) of blood pressure lowering drugs effect on systolic blood pressure in dialysis patients.

Supplemental Figure 5. Network estimates of blood pressure lowering drugs effects on diastolic blood pressure.

Supplemental Figure 6. Network estimates of blood pressure lowering drugs effects on heart rate.

Supplemental Figure 7. Network estimates of blood pressure lowering drugs effects on discontinuation due to adverse events.

Supplemental Figure 8. Network estimates of blood pressure lowering drugs effects on risk of hypotension.

Supplemental Figure 9. Network estimates of blood pressure lowering drugs effects on the risk of hyperkalaemia.

Supplemental Figure 10. Network estimates of blood pressure lowering drugs effects on serum potassium.

Supplemental Figure 11. Network of treatment comparison of blood pressure lowering agents effects on diastolic blood pressure, heart rate and potassium concentration outcomes.

Supplemental Figure 12. Network estimates of blood pressure lowering drugs effects on systolic blood pressure in trials with low risk of bias (n=9).

Supplemental References

**Supplemental Table 1. Electronic search terms**

| <b>CENTRAL</b>                                    | <b>Embase</b>                                     | <b>MEDLINE</b>                                    |
|---------------------------------------------------|---------------------------------------------------|---------------------------------------------------|
| 1. exp Antihypertensive Agents/                   | 1. exp Antihypertensive Agents/                   | 1. exp Antihypertensive Agents/                   |
| 2. (antihypertensive\$ adj (agent\$ or drug)).tw. | 2. (antihypertensive\$ adj (agent\$ or drug)).tw. | 2. (antihypertensive\$ adj (agent\$ or drug)).tw. |
| 3. exp Adrenergic alpha-Antagonists/              | 3. exp Adrenergic alpha-Antagonists/              | 3. exp Adrenergic alpha-Antagonists/              |
| 4. Doxazosin.tw.                                  | 4. Doxazosin.tw.                                  | 4. Doxazosin.tw.                                  |
| 5. Prazosin.tw.                                   | 5. Prazosin.tw.                                   | 5. Prazosin.tw.                                   |
| 6. Terazosin.tw.                                  | 6. Terazosin.tw.                                  | 6. Terazosin.tw.                                  |
| 7. exp Adrenergic alpha-2 Receptor Agonists/      | 7. exp Adrenergic alpha-2 Receptor Agonists/      | 7. exp Adrenergic alpha-2 Receptor Agonists/      |
| 8. Clonidine.tw.                                  | 8. Clonidine.tw.                                  | 8. Clonidine.tw.                                  |
| 9. Guanabenz.tw.                                  | 9. Guanabenz.tw.                                  | 9. Guanabenz.tw.                                  |
| 10. Guanfacine.tw.                                | 10. Guanfacine.tw.                                | 10. Guanfacine.tw.                                |
| 11. Methyldopa.tw.                                | 11. Methyldopa.tw.                                | 11. Methyldopa.tw.                                |
| 12. Lofexidine.tw.                                | 12. Lofexidine.tw.                                | 12. Lofexidine.tw.                                |
| 13. exp Diuretics, Potassium Sparing/             | 13. exp Diuretics, Potassium Sparing/             | 13. exp Diuretics, Potassium Sparing/             |
| 14. Eplerenone.tw.                                | 14. Eplerenone.tw.                                | 14. Eplerenone.tw.                                |
| 15. Amiloride.tw.                                 | 15. Amiloride.tw.                                 | 15. Amiloride.tw.                                 |
| 16. Spironolactone.tw.                            | 16. Spironolactone.tw.                            | 16. Spironolactone.tw.                            |
| 17. Triamterene.tw.                               | 17. Triamterene.tw.                               | 17. Triamterene.tw.                               |
| 18. exp Angiotensin Receptor Antagonists/         | 18. exp Angiotensin Receptor Antagonists/         | 18. exp Angiotensin Receptor Antagonists/         |
| 19. Azilsartan.tw.                                | 19. Azilsartan.tw.                                | 19. Azilsartan.tw.                                |
| 20. Candesartan.tw.                               | 20. Candesartan.tw.                               | 20. Candesartan.tw.                               |
| 21. Eprosartan.tw.                                | 21. Eprosartan.tw.                                | 21. Eprosartan.tw.                                |
| 22. Irbesartan.tw.                                | 22. Irbesartan.tw.                                | 22. Irbesartan.tw.                                |
| 23. Losartan.tw.                                  | 23. Losartan.tw.                                  | 23. Losartan.tw.                                  |
| 24. Olmesartan.tw.                                | 24. Olmesartan.tw.                                | 24. Olmesartan.tw.                                |
| 25. Telmisartan.tw.                               | 25. Telmisartan.tw.                               | 25. Telmisartan.tw.                               |
| 26. Valsartan.tw.                                 | 26. Valsartan.tw.                                 | 26. Valsartan.tw.                                 |
| 27. exp Angiotensin-Converting Enzyme Inhibitors/ | 27. exp Angiotensin-Converting Enzyme Inhibitors/ | 27. exp Angiotensin-Converting Enzyme Inhibitors/ |
| 28. Benazepril.tw.                                | 28. Benazepril.tw.                                | 28. Benazepril.tw.                                |
| 29. Captopril.tw.                                 | 29. Captopril.tw.                                 | 29. Captopril.tw.                                 |
| 30. Cilazapril.tw.                                | 30. Cilazapril.tw.                                | 30. Cilazapril.tw.                                |
| 31. Enalapril.tw.                                 | 31. Enalapril.tw.                                 | 31. Enalapril.tw.                                 |
| 32. Fosinopril.tw.                                | 32. Fosinopril.tw.                                | 32. Fosinopril.tw.                                |
| 33. Lisinopril.tw.                                | 33. Lisinopril.tw.                                | 33. Lisinopril.tw.                                |
| 34. Moexipril.tw.                                 | 34. Moexipril.tw.                                 | 34. Moexipril.tw.                                 |
| 35. Perindopril.tw.                               | 35. Perindopril.tw.                               | 35. Perindopril.tw.                               |
| 36. Quinapril.tw.                                 | 36. Quinapril.tw.                                 | 36. Quinapril.tw.                                 |
| 37. Ramipril.tw.                                  | 37. Ramipril.tw.                                  | 37. Ramipril.tw.                                  |
| 38. Trandolapril.tw.                              | 38. Trandolapril.tw.                              | 38. Trandolapril.tw.                              |
| 39. exp Adrenergic beta-Antagonists/              | 39. exp Adrenergic beta-Antagonists/              | 39. exp Adrenergic beta-Antagonists/              |
| 40. Carvedilol.tw.                                | 40. Carvedilol.tw.                                | 40. Carvedilol.tw.                                |
| 41. Labetalol.tw.                                 | 41. Labetalol.tw.                                 | 41. Labetalol.tw.                                 |
| 42. Acebutolol.tw.                                | 42. Acebutolol.tw.                                | 42. Acebutolol.tw.                                |
| 43. Pindolol.tw.                                  | 43. Pindolol.tw.                                  | 43. Pindolol.tw.                                  |
| 44. Penbutolol.tw.                                | 44. Penbutolol.tw.                                | 44. Penbutolol.tw.                                |
| 45. Atenolol.tw.                                  | 44. Penbutolol.tw.                                | 45. Atenolol.tw.                                  |

| <b>CENTRAL</b>                                  | <b>Embase</b>                                   | <b>MEDLINE</b>                                  |
|-------------------------------------------------|-------------------------------------------------|-------------------------------------------------|
| 46. Betaxolol.tw.                               | 45. Atenolol.tw.                                | 46. Betaxolol.tw.                               |
| 47. Bisoprolol.tw.                              | 46. Betaxolol.tw.                               | 47. Bisoprolol.tw.                              |
| 48. Celiprolol.tw.                              | 47. Bisoprolol.tw.                              | 48. Celiprolol.tw.                              |
| 49. Metoprolol.tw.                              | 48. Celiprolol.tw.                              | 49. Metoprolol.tw.                              |
| 50. Nebivolol.tw.                               | 49. Metoprolol.tw.                              | 50. Nebivolol.tw.                               |
| 51. Sotalol.tw.                                 | 50. Nebivolol.tw.                               | 51. Sotalol.tw.                                 |
| 52. Nadolol.tw.                                 | 51. Sotalol.tw.                                 | 52. Nadolol.tw.                                 |
| 53. Propranolol.tw.                             | 52. Nadolol.tw.                                 | 53. Propranolol.tw.                             |
| 54. Timolol.tw.                                 | 53. Propranolol.tw.                             | 54. Timolol.tw.                                 |
| 55. exp Calcium Channel Blockers/               | 54. Timolol.tw.                                 | 55. exp Calcium Channel Blockers/               |
| 56. Amlodipine.tw.                              | 55. exp Calcium Channel Blockers/               | 56. Amlodipine.tw.                              |
| 57. Bepridil.tw.                                | 56. Amlodipine.tw.                              | 57. Bepridil.tw.                                |
| 58. Clevidipine.tw.                             | 57. Bepridil.tw.                                | 58. Clevidipine.tw.                             |
| 59. Diltiazem.tw.                               | 58. Clevidipine.tw.                             | 59. Diltiazem.tw.                               |
| 60. Felodipine.tw.                              | 59. Diltiazem.tw.                               | 60. Felodipine.tw.                              |
| 61. Lacidipine.tw.                              | 60. Felodipine.tw.                              | 61. Lacidipine.tw.                              |
| 62. Lercanidipine.tw.                           | 61. Lacidipine.tw.                              | 62. Lercanidipine.tw.                           |
| 63. Levamlodipine.tw.                           | 62. Lercanidipine.tw.                           | 63. Levamlodipine.tw.                           |
| 64. Isradipine.tw.                              | 63. Levamlodipine.tw.                           | 64. Isradipine.tw.                              |
| 65. Nicardipine.tw.                             | 64. Isradipine.tw.                              | 65. Nicardipine.tw.                             |
| 66. Nifedipine.tw.                              | 65. Nicardipine.tw.                             | 66. Nifedipine.tw.                              |
| 67. Nimodipine.tw.                              | 66. Nifedipine.tw.                              | 67. Nimodipine.tw.                              |
| 68. Nisoldipine.tw.                             | 67. Nimodipine.tw.                              | 68. Nisoldipine.tw.                             |
| 69. Verapamil.tw.                               | 68. Nisoldipine.tw.                             | 69. Verapamil.tw.                               |
| 70. exp Diuretics/                              | 69. Verapamil.tw.                               | 70. exp Diuretics/                              |
| 71. Bumetanide.tw.                              | 70. exp Diuretics/                              | 71. Bumetanide.tw.                              |
| 72. Ethacrynic acid.tw.                         | 71. Bumetanide.tw.                              | 72. Ethacrynic acid.tw.                         |
| 73. Furosemide.tw.                              | 72. Ethacrynic acid.tw.                         | 73. Furosemide.tw.                              |
| 74. Piretanide.tw.                              | 73. Furosemide.tw.                              | 74. Piretanide.tw.                              |
| 75. Torsemide.tw.                               | 74. Piretanide.tw.                              | 75. Torsemide.tw.                               |
| 76. Bendroflumethiazide.tw.                     | 75. Torsemide.tw.                               | 76. Bendroflumethiazide.tw.                     |
| 77. Chlorothiazide.tw.                          | 76. Bendroflumethiazide.tw.                     | 77. Chlorothiazide.tw.                          |
| 78. Chlorthalidone.tw.                          | 77. Chlorothiazide.tw.                          | 78. Chlorthalidone.tw.                          |
| 79. Indapamide.tw.                              | 78. Chlorthalidone.tw.                          | 79. Indapamide.tw.                              |
| 80. Hydrochlorothiazide.tw.                     | 79. Indapamide.tw.                              | 80. Hydrochlorothiazide.tw.                     |
| 81. Methyclothiazide.tw.                        | 80. Hydrochlorothiazide.tw.                     | 81. Methyclothiazide.tw.                        |
| 82. Metolazone.tw.                              | 81. Methyclothiazide.tw.                        | 82. Metolazone.tw.                              |
| 83. Guanadrel.tw.                               | 82. Metolazone.tw.                              | 83. Guanadrel.tw.                               |
| 84. Guanethidine.tw.                            | 83. Guanadrel.tw.                               | 84. Guanethidine.tw.                            |
| 85. Reserpine.tw.                               | 84. Guanethidine.tw.                            | 85. Reserpine.tw.                               |
| 86. Aliskiren.tw.                               | 85. Reserpine.tw.                               | 86. Aliskiren.tw.                               |
| 87. exp Vasodilator Agents/                     | 86. Aliskiren.tw.                               | 87. exp Vasodilator Agents/                     |
| 88. Diazoxide.tw.                               | 87. exp Vasodilator Agents/                     | 88. Diazoxide.tw.                               |
| 89. Hydralazine.tw.                             | 88. Diazoxide.tw.                               | 89. Hydralazine.tw.                             |
| 90. Minoxidil.tw.                               | 89. Hydralazine.tw.                             | 90. Minoxidil.tw.                               |
| 91. Nitroprusside.tw.                           | 90. Minoxidil.tw.                               | 91. Nitroprusside.tw.                           |
| 92. (ace adj2 inhibitor\$.tw.                   | 91. Nitroprusside.tw.                           | 92. (ace adj2 inhibitor\$.tw.                   |
| 93. (angiotensin adj2 receptor antagonist\$.tw. | 92. (ace adj2 inhibitor\$.tw.                   | 93. (angiotensin adj2 receptor antagonist\$.tw. |
| 94. beta block\$.tw.                            | 93. (angiotensin adj2 receptor antagonist\$.tw. | 94. beta block\$.tw.                            |
| 95. zofenopril.tw.                              | 94. beta block\$.tw.                            | 95. zofenopril.tw.                              |
| 96. imidapril.tw.                               | 95. zofenopril.tw.                              | 96. imidapril.tw.                               |
| 97. alprenolol.tw.                              | 96. imidapril.tw.                               | 97. alprenolol.tw.                              |
| 98. bucindolol.tw.                              | 97. alprenolol.tw.                              | 98. bucindolol.tw.                              |

| <b>CENTRAL</b>                                                                     | <b>Embase</b>                                                                       | <b>MEDLINE</b>                                                                     |
|------------------------------------------------------------------------------------|-------------------------------------------------------------------------------------|------------------------------------------------------------------------------------|
| 99. carteolol.tw.                                                                  | 98. bucindolol.tw.                                                                  | 99. carteolol.tw.                                                                  |
| 100.oxprenolol.tw.                                                                 | 99. carteolol.tw.                                                                   | 100.oxprenolol.tw.                                                                 |
| 101.aranidipine.tw.                                                                | 100. oxprenolol.tw.                                                                 | 101.aranidipine.tw.                                                                |
| 102.azelnidipine.tw.                                                               | 101. aranidipine.tw.                                                                | 102.azelnidipine.tw.                                                               |
| 103.barnidipine.tw.                                                                | 102. azelnidipine.tw.                                                               | 103.barnidipine.tw.                                                                |
| 104.benidipine.tw.                                                                 | 103. barnidipine.tw.                                                                | 104.benidipine.tw.                                                                 |
| 105.cilnidipine.tw.                                                                | 104. benidipine.tw.                                                                 | 105.cilnidipine.tw.                                                                |
| 106.efonidipine.tw.                                                                | 105. cilnidipine.tw.                                                                | 106.efonidipine.tw.                                                                |
| 107.nilvadipine.tw.                                                                | 106. efonidipine.tw.                                                                | 107.nilvadipine.tw.                                                                |
| 108.nitrendipine.tw.                                                               | 107. nilvadipine.tw.                                                                | 108.nitrendipine.tw.                                                               |
| 109.pranidipine.tw.                                                                | 108. nitrendipine.tw.                                                               | 109.pranidipine.tw.                                                                |
| 110.calcium channel blocker*.tw.                                                   | 109. pranidipine.tw.                                                                | 110.calcium channel blocker*.tw.                                                   |
| 111.angiotensin receptor blocker*.tw.                                              | 110. calcium channel blocker*.tw.                                                   | 111.angiotensin receptor blocker*.tw.                                              |
| 112.angiotensin converting enzyme inhibitor*.tw.                                   | 111. angiotensin receptor blocker*.tw.                                              | 112.angiotensin converting enzyme inhibitor*.tw.                                   |
| 113.Renin Inhibitor*.tw.                                                           | 112. angiotensin converting enzyme inhibitor*.tw.                                   | 113.Renin Inhibitor*.tw.                                                           |
| 114.endothelin receptor antagonist\$.tw.                                           | 113. Renin Inhibitor*.tw.                                                           | 114.endothelin receptor antagonist\$.tw.                                           |
| 115.endothelin receptor blocker\$.tw.                                              | 114. endothelin receptor antagonist\$.tw.                                           | 115.endothelin receptor blocker\$.tw.                                              |
| 116.endothelin inhibitor\$.tw.                                                     | 115. endothelin receptor blocker\$.tw.                                              | 116.endothelin inhibitor\$.tw.                                                     |
| 117.or/1-116                                                                       | 116. endothelin inhibitor\$.tw.                                                     | 117.or/1-116                                                                       |
| 118.exp Renal Dialysis/                                                            | 117. or/1-116                                                                       | 118.exp Renal Dialysis/                                                            |
| 119.exp Kidney Failure, Chronic/                                                   | 118. exp Renal Dialysis/                                                            | 119.exp Kidney Failure, Chronic/                                                   |
| 120.dialysis.tw.                                                                   | 119. exp Kidney Failure, Chronic/                                                   | 120.dialysis.tw.                                                                   |
| 121.\$dialysis.tw.                                                                 | 120. dialysis.tw.                                                                   | 121.\$dialysis.tw.                                                                 |
| 122.Renal Insufficiency, Chronic/                                                  | 121. \$dialysis.tw.                                                                 | 122.Renal Insufficiency, Chronic/                                                  |
| 123.(end-stage kidney or end-stage renal or endstage kidney or endstage renal).tw. | 122. Renal Insufficiency, Chronic/                                                  | 123.(end-stage kidney or end-stage renal or endstage kidney or endstage renal).tw. |
| 124.(ESKD or ESKF or ESRD or ESRF).tw.                                             | 123. (end-stage kidney or end-stage renal or endstage kidney or endstage renal).tw. | 124.(ESKD or ESKF or ESRD or ESRF).tw.                                             |
| 125.(chronic kidney adj3 (stage 5 or stage V)).tw.                                 | 124. (ESKD or ESKF or ESRD or ESRF).tw.                                             | 125.(chronic kidney adj3 (stage 5 or stage V)).tw.                                 |
| 126.exp continuous ambulatory peritoneal dialysis/                                 | 125. (chronic kidney adj3 (stage 5 or stage V)).tw.                                 | 126.or/118-125                                                                     |
| 127.hemodialysis.tw.                                                               | 126. exp continuous ambulatory peritoneal dialysis/                                 | 127.randomized controlled trial.pt.                                                |
| 128.exp hemodialysis/                                                              | 127. hemodialysis.tw.                                                               | 128.controlled clinical trial.pt.                                                  |
| 129.(CAPD or CCPD or APD).tw.                                                      | 128. exp hemodialysis/                                                              | 129.randomized.ab.                                                                 |
| 130.h?emodialysis.tw.                                                              | 129. (CAPD or CCPD or APD).tw.                                                      | 130.placebo.ab.                                                                    |
| 131.exp end stage renal disease/                                                   | 130. h?emodialysis.tw.                                                              | 131.clinical trials as topic/                                                      |
| 132.or/118-131                                                                     | 131. exp end stage renal disease/                                                   | 132.trial.ti.                                                                      |
| 133.117 and 132                                                                    | 132. or/118-131                                                                     | 133.randomly.ab.                                                                   |
|                                                                                    | 133. random:.tw.                                                                    | 134.or/127-133                                                                     |
|                                                                                    | 134. double-blind:.tw.                                                              | 135.animals/ not (humans/ and animals/)                                            |
|                                                                                    | 135. placebo:.mp.                                                                   | 136.134 not 135                                                                    |
|                                                                                    | 136. or/133-135                                                                     | 137.117 and 126 and 136                                                            |
|                                                                                    | 137. 117 and 132 and 136                                                            |                                                                                    |

**Supplemental Table 2. Characteristics of included studies**

| Study                     | Country     | Design    | Duration (weeks) | Population | No of patients | Male (%) | Mean age (years) | Intervention 1                       | Intervention 2                                       | Control                                                      | Baseline SBP (mmHg) | BP measurement |
|---------------------------|-------------|-----------|------------------|------------|----------------|----------|------------------|--------------------------------------|------------------------------------------------------|--------------------------------------------------------------|---------------------|----------------|
| London et al (1994) (1)   | France      | parallel  | 52               | HD         | 24             | 58       | 54               | perindopril 2-4 mg weekly            |                                                      | nitrendipine 20-40 mg od                                     | 177                 | ABPM           |
| Perfect (1997)(2)         | New Zealand | Factorial | 24               | mixed      | 107            | 68       | 49               | enalapril 2.5-5 mg OD                |                                                      | Placebo                                                      | 138                 | clinic         |
| Nakamoto et al (2004) (3) | Japan       | parallel  | 12               | PD         | 36             |          | 58               | benzapril or enalapril 2.5-10 mg/day | valsartan or candesartan 20-80 mg/day or 4-12 mg/day | amlodipine 2.5-10 mg/day                                     | 154                 | pre-dialysis   |
| Suzuki et al (2004) (4)   | Japan       | parallel  | 52               | HD         | 33             | 61       | 65               | enalapril 10mg/day                   | losartan 100mg/day                                   | losartan + enalapril losartan 100mg/day + enalapril 10mg/day | 170                 | clinic         |

| Study                         | Country | Design   | Duration (weeks) | Population | No of patients | Male (%) | Mean age (years) | Intervention 1                               | Intervention 2 | Control               | Baseline SBP (mmHg) | BP measurement |
|-------------------------------|---------|----------|------------------|------------|----------------|----------|------------------|----------------------------------------------|----------------|-----------------------|---------------------|----------------|
| Matsumoto et al (2006) (5)    | Japan   | parallel | 24               | HD         | 27             | 56       | 54               | imidapril 2.5mg/day                          |                | Placebo               | 150                 | pre-dialysis   |
| Yu et al (2006) (6)           | Taiwan  | parallel | 52               | HD         | 46             | 65       | 47               | ramipril 1.25-2.5mg 3 times/week on nonD day |                | Placebo               | 123                 | clinic         |
| FOSIDIAL (2006) (7)           | France  | parallel | 104              | HD         | 397            | 52       | 67               | fosinopril 20 mg/day (13.2(5.5) mg/day)      |                | Placebo               | 148                 | pre-dialysis   |
| Ordaz-Medina et al (2010) (8) | Mexico  | parallel | 12               | HD         | 25             | 52       | 41               | enalapril 10 mg BD                           |                | Placebo               | 152                 | clinic         |
| Yilmaz et al (2010) (9)       | Turkey  | parallel | 52               | HD         | 92             | 57       | 52               | ramipril 5-10mg/day                          |                | amlodipine 5-10mg/day | 156                 | ABPM           |

| Study                         | Country | Design   | Duration (weeks) | Population | No of patients | Male (%) | Mean age (years) | Intervention 1                                                              | Intervention 2 | Control           | Baseline SBP (mmHg) | BP measurement |
|-------------------------------|---------|----------|------------------|------------|----------------|----------|------------------|-----------------------------------------------------------------------------|----------------|-------------------|---------------------|----------------|
| Reyes-Marin et al (2012) (10) | Mexico  | parallel | 52               | PD         | 60             | 60       | 46               | enalapril 10 mg/day                                                         |                | losartan 50mg/day | 133                 |                |
| Ottosson et al (2003) (11)    | Sweden  | parallel | 6                | HD         | 20             | 90       | 67               | candesartan 4-16 mg                                                         |                | Placebo           | 149                 | pre-dialysis   |
| Suzuki et al (2008) (12)      | Japan   | parallel | 156              | HD         | 360            | 59       | 60               | losartan 50-150 mg/day<br>candesartan 8-12 mg/day<br>valsartan 80-160mg/day |                | Standard of care  | 155                 | pre-dialysis   |
| Cice et al (2010) (13)        | Italy   | parallel | 156              | HD         | 332            | 54       | 63               | telmisartan 80mg/day                                                        |                | Placebo           | 125                 | pre-dialysis   |
| OCTOPUS (2013) (14)           | Japan   | parallel | 182              | HD         | 469            | 62       | 60               | olmesartan 10-40mg/day                                                      |                | Standard of care  | 159                 | pre-dialysis   |

| Study                       | Country  | Design    | Duration (weeks) | Population | No of patients | Male (%) | Mean age (years) | Intervention 1                               | Intervention 2 | Control                                          | Baseline SBP (mmHg) | BP measurement |
|-----------------------------|----------|-----------|------------------|------------|----------------|----------|------------------|----------------------------------------------|----------------|--------------------------------------------------|---------------------|----------------|
| SAFIR (2014) (15)           | Denmark  | parallel  | 52               | HD         | 82             | 68       | 62               | irbesartan 150-300mg/day                     |                | Placebo                                          | 147                 | pre-dialysis   |
| Satirapoj et al (2014) (16) | Thailand | parallel  | 12               | HD         | 33             | 61       | 55               | valsartan 80-320 mg/day, average 136 mg/day  |                | Standard of care                                 | 147                 | pre-dialysis   |
| Sun et al (2016) (17)       | China    | parallel  | 52               | HD         | 65             | 48       | 58               | losartan 50mg/day                            |                | bisoprolol 5mg/day                               | 153                 | home           |
| Meltzer et al (1984) (18)   | USA      | parallel  | 12               | HD         | 20             | 45       | 50               | prazosin 8.3±2.2 mg/day in two divided doses |                | propranolol 123 ± 39 mg/day in two divided doses | 162                 | pre-dialysis   |
| Cice et al (1997) (19)      | Italy    | Crossover | 2                | HD         | 60             | 70       | 52               | bisoprolol 10 mg/day                         |                | nifedipine 20 mg BD                              | 146                 | pre-dialysis   |
| Cice et al (1998) (20)      | Italy    | parallel  | 6                | HD         | 46             |          | 54               | carvedilol 50 mg/day                         |                | Placebo                                          | 158                 | pre-dialysis   |



| Study                      | Country | Design   | Duration (weeks) | Population | No of patients | Male (%) | Mean age (years) | Intervention 1                         | Intervention 2 | Control                                 | Baseline SBP (mmHg) | BP measurement |
|----------------------------|---------|----------|------------------|------------|----------------|----------|------------------|----------------------------------------|----------------|-----------------------------------------|---------------------|----------------|
| Cice et al (2001) (21)     | Italy   | parallel | 52               | HD         | 114            | 61       | 55               | carvedilol 25 mg BD                    |                | Placebo                                 | 134                 | pre-dialysis   |
| HDPAL (2014) (22)          | USA     | parallel | 52               | HD         | 200            | 66       | 53               | atenolol 25mg-100mg TIW after dialysis |                | lisinopril 10mg-40mg TIW after dialysis | 152                 | home           |
| BLOCADE (2016) (23)        | ANZ     | parallel | 52               | mixed      | 49             | 63       | 59               | carvedilol 6.25-25mg BD                |                | Placebo                                 | 136                 | post-dialysis  |
| London et al (1990) (24)   | France  | parallel | 16               | HD         | 39             | 49       | 57               | nitrendipine 20 mg od-bid              |                | Placebo                                 | 189                 | pre-dialysis   |
| Cice et al (1999) (25)     | Italy   | parallel | 12               | HD         | 48             | 60       | 46               | diltiazem 60 mg BD                     |                | Placebo                                 | 127                 | pre-dialysis   |
| Tepel et al (2008) (26)    | Germany | parallel | 76               | HD         | 251            | 63       | 61               | amlodipine 10 mg/day                   |                | Placebo                                 | 140                 | pre-dialysis   |
| Hausberg et al (2010) (27) | Germany | parallel | 26               | HD         | 23             | 70       | 47               | moxonidine 0.3 mg/day                  |                | Placebo                                 |                     |                |

| Study                      | Country | Design    | Duration (weeks) | Population | No of patients | Male (%) | Mean age (years) | Intervention 1                                          | Intervention 2 | Control          | Baseline SBP (mmHg) | BP measurement |
|----------------------------|---------|-----------|------------------|------------|----------------|----------|------------------|---------------------------------------------------------|----------------|------------------|---------------------|----------------|
| Gross et al (2005) (28)    | USA     | Crossover | 2                | HD         | 8              | 38       | 53               | spironolactone 50mg BD                                  |                | Placebo          | 143                 | pre-dialysis   |
| Taheri et al (2009) (29)   | Iran    | parallel  | 26               | HD         | 16             | 69       | 58               | spironolactone 25mg/day                                 |                | Placebo          |                     |                |
| Vukusich et al (2010) (30) | Chile   | parallel  | 104              | HD         | 53             | 64       | 58               | spironolactone 50 mg thrice weekly on non-dialysis days |                | Placebo          | 149                 | pre-dialysis   |
| Taheri et al (2012) (31)   | Iran    | parallel  | 24               | PD         | 18             | 56       | 54               | spironolactone 25 mg every other day                    |                | Placebo          |                     |                |
| Zaripova et al (2011) (32) | Russia  | parallel  | 24               | HD         | 71             |          |                  | spironolactone 25 mg/day                                |                | Standard of care |                     |                |
| DOHAS (2014) (33)          | Japan   | parallel  | 156              | HD         | 309            | 66       | 68               | spironolactone 25mg/day                                 |                | Standard of care | 150                 |                |

| Study                                | Country | Design   | Duration (weeks) | Population | No of patients | Male (%) | Mean age (years) | Intervention 1                | Intervention 2 | Control          | Baseline SBP (mmHg) | BP measurement |
|--------------------------------------|---------|----------|------------------|------------|----------------|----------|------------------|-------------------------------|----------------|------------------|---------------------|----------------|
| Ni et al (2014) (34)                 | China   | parallel | 12               | mixed      | 76             | 59       | 55               | spironolactone 25-50 mg/day   |                | Placebo          | 146                 | clinic         |
| Feniman-De-Stefano et al (2015) (35) | Brazil  | parallel | 24               | HD         | 17             | 53       | 54               | spironolactone 12.5-25 mg/day |                | Placebo          | 137                 | ABPM           |
| Ito et al (2015) (36)                | Japan   | parallel | 104              | PD         | 158            | 72       | 57               | spironolactone 25 mg/day      |                | Standard of care | 136                 | clinic         |
| PHASE (2015) (37)                    | Canada  | parallel | 13               | HD         | 154            | 62       | 63               | eplerenone 25-50 mg/day       |                | Placebo          | 146                 |                |
| Lin et al (2016) (38)                | China   | parallel | 104              | mixed      | 253            | 60       | 71               | spironolactone 25 mg/day      |                | Placebo          | 143                 |                |

| Study                      | Country | Design   | Duration (weeks) | Population | No of patients | Male (%) | Mean age (years) | Intervention 1       | Intervention 2 | Control                                                                    | Baseline SBP (mmHg) | BP measurement |
|----------------------------|---------|----------|------------------|------------|----------------|----------|------------------|----------------------|----------------|----------------------------------------------------------------------------|---------------------|----------------|
| Ito et al (2014) (39)      | Japan   | parallel | 12               | HD         | 18             | 67       | 59               | aliskiren 150 mg/day |                | ARB (valsartan 80mg n=12 or telmisartan 40 mg n=5 or olmesartan 20 mg n=1) | 142                 | pre-dialysis   |
| Kuriyama et al (2014) (40) | Japan   | parallel | 24               | HD         | 74             | 88       | 61               | aliskiren 150mg/day  |                | amlodipine 5 mg/day                                                        | 164                 | home           |

ABPM= ambulatory blood pressure monitoring. ANZ= Australia and New Zealand. BP= blood pressure. HD= haemodialysis. PD= peritoneal dialysis. SBP= systolic blood pressure.

**Supplemental Table 3. Risk of bias assessments of all included trials**

| Study                     | Random sequence generation | Allocation concealment | Blinding (patients) | Blinding (investigators) | Blinding (outcome assessment) | Double-blind?  | Incomplete outcome | ITT | Selective reporting | Baseline imbalance | Summary quality      |
|---------------------------|----------------------------|------------------------|---------------------|--------------------------|-------------------------------|----------------|--------------------|-----|---------------------|--------------------|----------------------|
| London et al (1994)       | Low risk                   | Unclear risk           | Low risk            | Low risk                 | Low risk                      | Double-blinded | Unclear risk       | Yes | Low risk            | Low risk           | Low risk of bias     |
| Perfect (1997)            | Low risk                   | Low risk               | Low risk            | Low risk                 | Low risk                      | Double-blinded | Unclear risk       | Yes | Low risk            | Unclear risk       | Low risk of bias     |
| Nakamoto et al (2004)     | Unclear risk               | Unclear risk           | Unclear risk        | Unclear risk             | Unclear risk                  | Not specified  | Low risk           | Yes | Low risk            | Low risk           | Unclear risk of bias |
| Suzuki et al (2004)       | Unclear risk               | Low risk               | High risk           | High risk                | High risk                     | Open-label     | High risk          | No  | Unclear risk        | Low risk           | High risk of bias    |
| Matsumoto et al (2006)    | Unclear risk               | Unclear risk           | Unclear risk        | Unclear risk             | Unclear risk                  | Not specified  | High risk          | No  | Unclear risk        | Low risk           | High risk of bias    |
| Yu et al (2006)           | Unclear risk               | Unclear risk           | Low risk            | Low risk                 | Unclear risk                  | Double-blinded | Low risk           | Yes | Low risk            | Low risk           | Unclear risk of bias |
| FOSIDIAL (2006)           | Low risk                   | Low risk               | Low risk            | Low risk                 | Low risk                      | Double-blinded | Unclear risk       | Yes | Low risk            | High risk          | High risk of bias    |
| Ordaz-Medina et al (2010) | Low risk                   | Unclear risk           | Low risk            | Low risk                 | Low risk                      | Double-blinded | Low risk           | Yes | Low risk            | Low risk           | Low risk of bias     |
| Yilmaz et al (2010)       | Unclear risk               | Unclear risk           | High risk           | High risk                | High risk                     | Open-label     | Unclear risk       | No  | Low risk            | Low risk           | High risk of bias    |
| Reyes-Marin et al (2012)  | Low risk                   | Unclear risk           | High risk           | High risk                | High risk                     | Open-label     | Low risk           | Yes | Low risk            | Low risk           | High risk of bias    |

| Study                  | Random sequence generation | Allocation concealment | Blinding (patients) | Blinding (investigators) | Blinding (outcome assessment) | Double-blind?  | Incomplete outcome | ITT     | Selective reporting | Baseline imbalance | Summary quality      |
|------------------------|----------------------------|------------------------|---------------------|--------------------------|-------------------------------|----------------|--------------------|---------|---------------------|--------------------|----------------------|
| Ottosson et al (2003)  | Low risk                   | Unclear risk           | Low risk            | Low risk                 | Unclear risk                  | Double-blinded | High risk          | No      | Low risk            | High risk          | High risk of bias    |
| Suzuki et al (2008)    | Low risk                   | Unclear risk           | High risk           | High risk                | High risk                     | Open-label     | Low risk           | No      | Low risk            | Low risk           | High risk of bias    |
| Cice et al (2010)      | Low risk                   | Low risk               | Low risk            | Low risk                 | Low risk                      | Double-blinded | Low risk           | Yes     | Low risk            | Low risk           | Low risk of bias     |
| OCTOPUS (2013)         | Unclear risk               | Unclear risk           | High risk           | High risk                | Low risk                      | Open-label     | Low risk           | Yes     | Low risk            | Low risk           | Unclear risk of bias |
| SAFIR (2014)           | Low risk                   | Low risk               | Low risk            | Low risk                 | Low risk                      | Double-blinded | Low risk           | Yes     | Low risk            | Low risk           | Low risk of bias     |
| Satirapoj et al (2014) | Low risk                   | Unclear risk           | High risk           | High risk                | High risk                     | Open-label     | Low risk           | Yes     | Low risk            | Unclear risk       | High risk of bias    |
| Sun et al (2016)       | Low risk                   | Low risk               | High risk           | High risk                | Low risk                      | Open-label     | Unclear risk       | No      | Low risk            | Low risk           | High risk of bias    |
| Meltzer et al (1984)   | Unclear risk               | Unclear risk           | High risk           | High risk                | High risk                     | Open-label     | Unclear risk       | Unclear | Unclear risk        | Unclear risk       | High risk of bias    |
| Cice et al (1997)      | Unclear risk               | Unclear risk           | High risk           | High risk                | High risk                     | Open-label     | Low risk           | Yes     | Low risk            | Low risk           | High risk of bias    |
| Cice et al (1998)      | Unclear risk               | Unclear risk           | Low risk            | Low risk                 | Unclear risk                  | Double-blinded | Unclear risk       | No      | Unclear risk        | Low risk           | Unclear risk of bias |
| Cice et al (2001,2003) | Low risk                   | Unclear risk           | Low risk            | Low risk                 | Low risk                      | Double-blinded | Low risk           | Yes     | Low risk            | Low risk           | Low risk of bias     |

| Study                 | Random sequence generation | Allocation concealment | Blinding (patients) | Blinding (investigators) | Blinding (outcome assessment) | Double-blind?  | Incomplete outcome | ITT     | Selective reporting | Baseline imbalance | Summary quality      |
|-----------------------|----------------------------|------------------------|---------------------|--------------------------|-------------------------------|----------------|--------------------|---------|---------------------|--------------------|----------------------|
| HDPAL (2014)          | Low risk                   | Low risk               | Unclear risk        | Unclear risk             | Low risk                      | Open-label     | Low risk           | Yes     | Low risk            | Low risk           | Low risk of bias     |
| BLOCAD E (2016)       | Low risk                   | Low risk               | Low risk            | Low risk                 | Low risk                      | Double-blinded | Low risk           | Yes     | Low risk            | Low risk           | Low risk of bias     |
| London et al (1990)   | Low risk                   | Unclear risk           | Low risk            | Low risk                 | Unclear risk                  | Double-blinded | Low risk           | Yes     | Unclear risk        | Low risk           | Low risk of bias     |
| Cice et al (1999)     | Unclear risk               | Unclear risk           | Low risk            | Unclear risk             | Low risk                      | Double-blinded | Low risk           | Yes     | Low risk            | Low risk           | Unclear risk of bias |
| Tepel et al (2008)    | Low risk                   | Low risk               | Low risk            | Low risk                 | Low risk                      | Double-blinded | Low risk           | Yes     | Low risk            | Unclear risk       | Low risk of bias     |
| Hausberg et al (2010) | Unclear risk               | Unclear risk           | Unclear risk        | Unclear risk             | Unclear risk                  | Not specified  | Low risk           | Yes     | Unclear risk        | Unclear risk       | Unclear risk of bias |
| Gross et al (2005)    | Low risk                   | Unclear risk           | Low risk            | Low risk                 | Low risk                      | Double-blinded | Low risk           | Yes     | Low risk            | Low risk           | Low risk of bias     |
| Taheri et al (2009)   | Unclear risk               | Unclear risk           | Low risk            | Low risk                 | Low risk                      | Double-blinded | High risk          | No      | Low risk            | Unclear risk       | High risk of bias    |
| Vukusich et al (2010) | Unclear risk               | Unclear risk           | Low risk            | Low risk                 | Low risk                      | Double-blinded | High risk          | No      | Low risk            | Low risk           | Unclear risk of bias |
| Taheri et al (2012)   | Unclear risk               | Unclear risk           | Low risk            | Low risk                 | Low risk                      | Double-blinded | Unclear risk       | No      | Unclear risk        | Low risk           | Unclear risk of bias |
| Zaripova et al (2012) | Unclear risk               | Unclear risk           | High risk           | High risk                | High risk                     | Open-label     | Unclear risk       | Unclear | Unclear risk        | Unclear risk       | High risk of bias    |

| Study                           | Random sequence generation | Allocation concealment | Blinding (patients) | Blinding (investigators) | Blinding (outcome assessment) | Double-blind?  | Incomplete outcome | ITT | Selective reporting | Baseline imbalance | Summary quality      |
|---------------------------------|----------------------------|------------------------|---------------------|--------------------------|-------------------------------|----------------|--------------------|-----|---------------------|--------------------|----------------------|
| DOHAS (2014)                    | Unclear risk               | Unclear risk           | Low risk            | Low risk                 | Low risk                      | Open-label     | Low risk           | Yes | Low risk            | Unclear risk       | Unclear risk of bias |
| Ni et al (2014)                 | Unclear risk               | Unclear risk           | Low risk            | Low risk                 | Low risk                      | Double-blinded | Low risk           | Yes | Low risk            | Low risk           | Low risk of bias     |
| Feniman-De-Stefano et al (2015) | Unclear risk               | Unclear risk           | Low risk            | Low risk                 | Low risk                      | Double-blinded | Unclear risk       | No  | Low risk            | Unclear risk       | Unclear risk of bias |
| Ito et al (2015)                | Unclear risk               | Unclear risk           | High risk           | High risk                | Low risk                      | Open-label     | Low risk           | Yes | Low risk            | Low risk           | High risk of bias    |
| PHASE (2015)                    | Low risk                   | Low risk               | Low risk            | Low risk                 | Low risk                      | Double-blinded | Low risk           | Yes | Low risk            | Low risk           | Low risk of bias     |
| Lin et al (2016)                | Low risk                   | Low risk               | Low risk            | Low risk                 | Low risk                      | Double-blinded | Low risk           | Yes | Low risk            | Low risk           | Low risk of bias     |
| Ito et al (2014)                | Unclear risk               | Low risk               | High risk           | High risk                | High risk                     | Open-label     | Low risk           | Yes | Low risk            | Unclear risk       | High risk of bias    |
| Kuriyama et al (2014)           | Unclear risk               | Unclear risk           | High risk           | High risk                | Low risk                      | Open-label     | High risk          | No  | Low risk            | Low risk           | High risk of bias    |

ITT=intention-to-treat analysis.



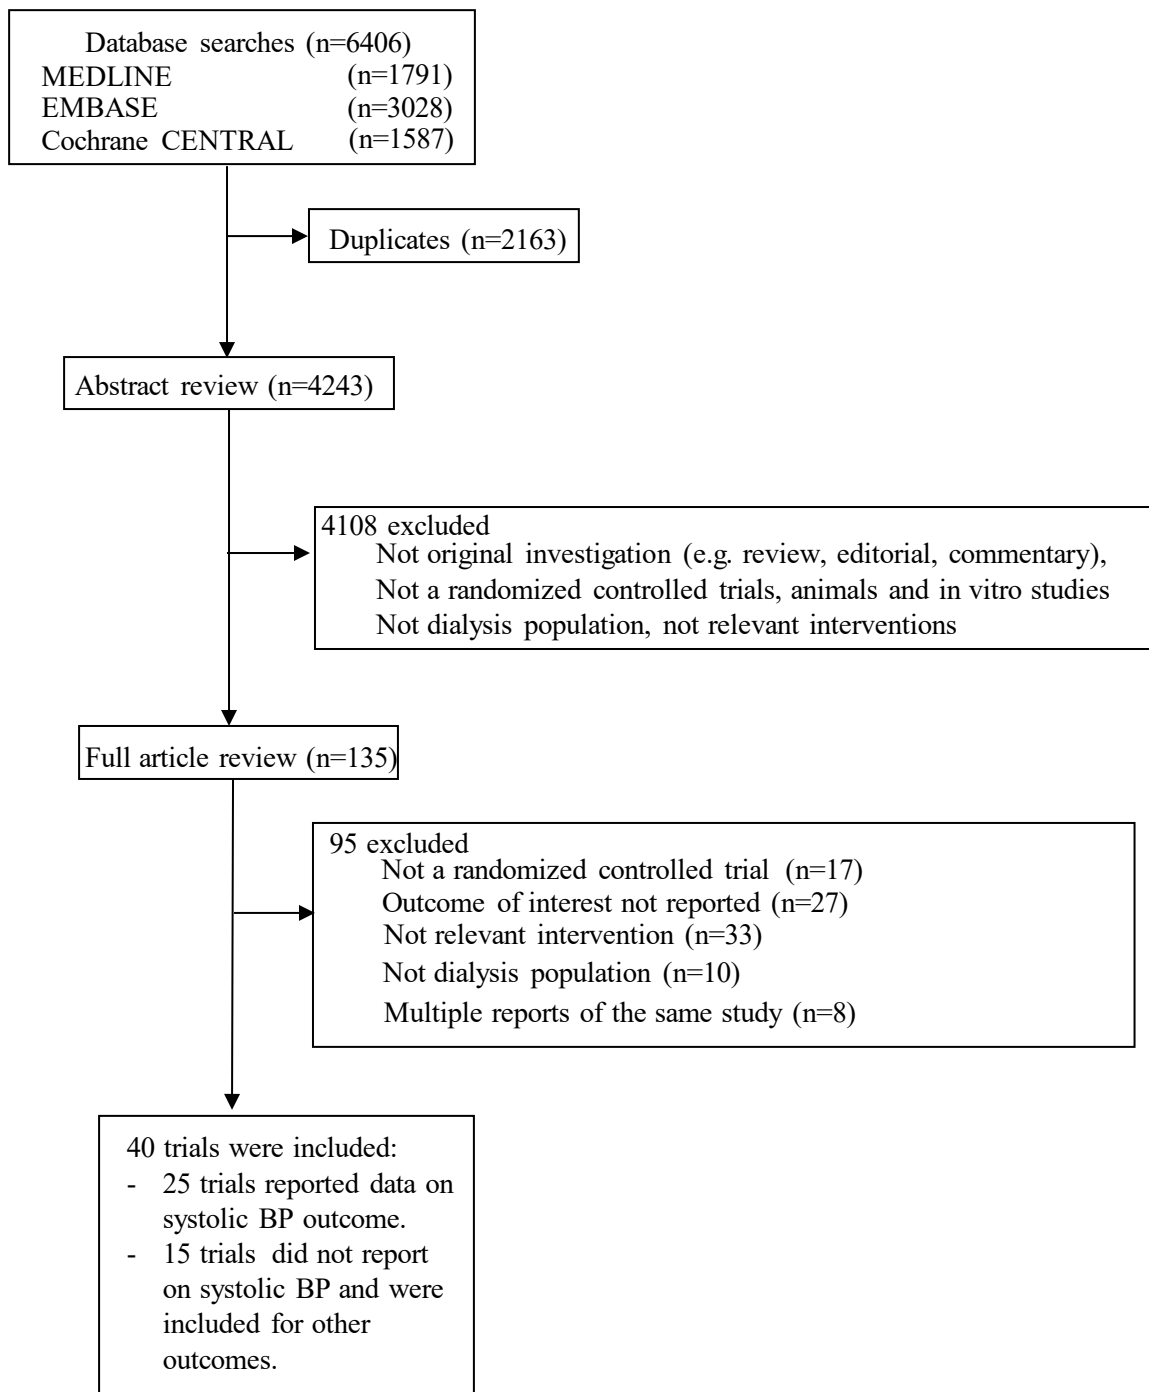

**Supplemental Figure 1. Electronic searches in MEDLINE, Embase, and the Cochrane Central Register of Randomised Trials for trials on blood pressure lowering drugs in adults with end-stage kidney disease requiring dialysis.**

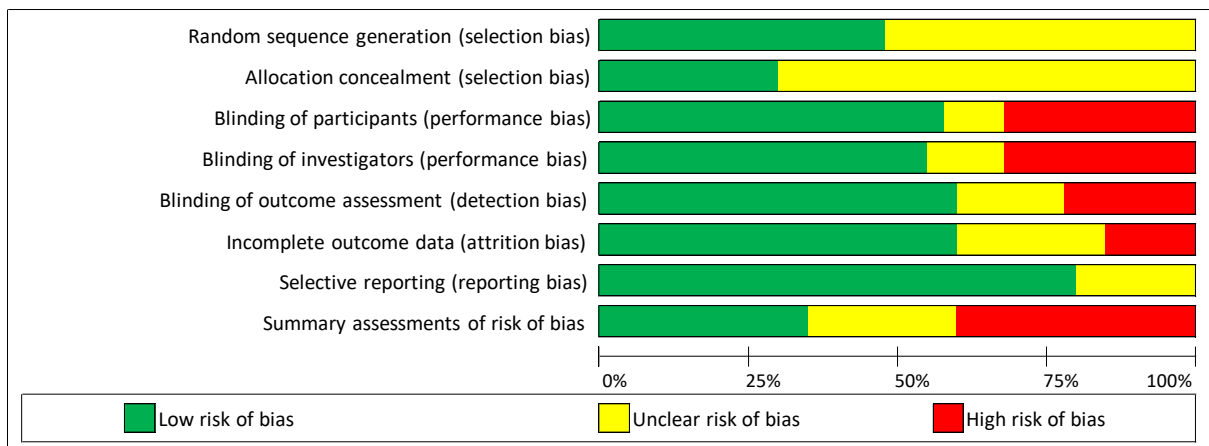

**Supplemental Figure 2. Domain-specific risk of bias assessment summary of included studies.**

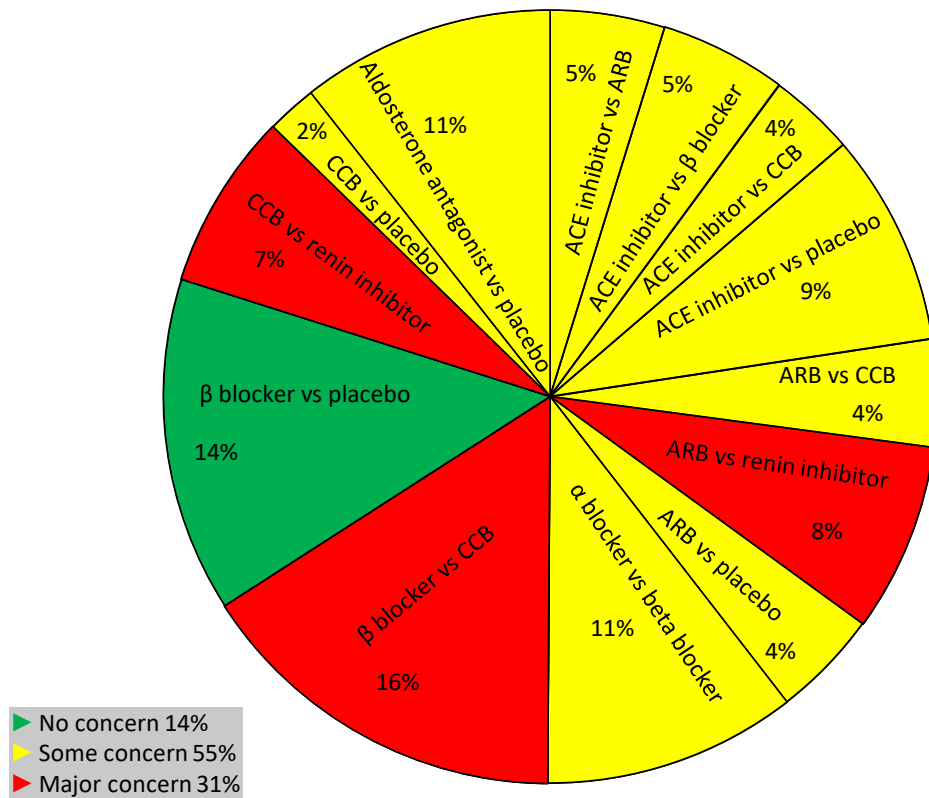

**Supplemental Figure 3. Study limitations weighted by contribution of direct estimates to the network of blood pressure lowering drugs for systolic blood pressure outcome.**

ACE=angiotensin-converting enzyme. ARB=angiotensin-receptor blockers. CCB= calcium-channel blockers.

**Supplemental Table 4. Assessment of loop-specific (in closed loops of evidence) and overall inconsistency and heterogeneity.**

| <b>Outcome</b>                  | <b>Closed loop of evidence</b> | <b>Inconsistency factor (95% CI)</b> | <b>Loop heterogeneity (<math>\tau^2</math>)</b> | <b>P for global inconsistency test</b> | <b>Network heterogeneity (<math>\tau^2</math>)</b> |
|---------------------------------|--------------------------------|--------------------------------------|-------------------------------------------------|----------------------------------------|----------------------------------------------------|
| <b>Systolic blood pressure</b>  | ARB-CCB-Placebo                | 9.23 (0.00,35.39)                    | 28.58                                           |                                        | 0.00 (low heterogeneity)                           |
|                                 | ACEI-ARB-Placebo               | 3.75 (0.00,18.02)                    | 0.00                                            | 0.96                                   |                                                    |
|                                 | ACEI-CCB-Placebo               | 3.09 (0.00,13.11)                    | 4.77                                            |                                        |                                                    |
|                                 | BB-CCB-Placebo                 | 2.62 (0.00,17.35)                    | 15.73                                           |                                        |                                                    |
|                                 | ARB-CCB- Renin inhibitors      | 2.3 (0.00,16.53)                     | 0.00                                            |                                        |                                                    |
|                                 | ACEI-BB-CCB                    | 2.15 (0.00,10.65)                    | 0.00                                            |                                        |                                                    |
|                                 | ACEI-ARB-CCB                   | 1.59 (0.00,17.61)                    | 0.00                                            |                                        |                                                    |
|                                 | ACEI-BB-Placebo                | 0.14 (0.00,7.09)                     | 0.00                                            |                                        |                                                    |
| <b>Diastolic blood pressure</b> | ACEI-BB-Placebo                | 2.82(0.00,8.54)                      | 2.16                                            |                                        | 3.9 (high heterogeneity)                           |
|                                 | ARB-CCB-Renin inhibitors       | 2.4(0.00,14.72)                      | 0.00                                            | 1.0                                    |                                                    |
|                                 | ACEI-ARB-CCB                   | 2.05(0.00,16.72)                     | 0.00                                            |                                        |                                                    |
|                                 | ARB-CCB-Placebo                | 1.84(0.00,32.80)                     | 101.53                                          |                                        |                                                    |
|                                 | ACEI-CCB-Placebo               | 1.39(0.00,13.05)                     | 18.54                                           |                                        |                                                    |
|                                 | ACEI-ARB-Placebo               | 0.32(0.00,14.21)                     | 7.56                                            |                                        |                                                    |
| <b>Heart rate</b>               | ACEI-ARB-Placebo               | 7.23(0.21,14.24)                     | 0.00                                            | 0.72                                   | 3.7 (high heterogeneity)                           |
|                                 | ACEI-CCB-Placebo               | 6.26(0.00,14.96)                     | 0.00                                            |                                        |                                                    |
|                                 | ACEI-ARB-CCBs                  | 3(0.00,12.32)                        | 0.00                                            |                                        |                                                    |
|                                 | BB-CCB-Placebo                 | 0.49 (0.00,13.97)                    | 0.00                                            |                                        |                                                    |
|                                 | ARB-CCB-Placebo                | 0.26(0.00,8.47)                      | 0.00                                            |                                        |                                                    |
| <b>Discontinuation due to</b>   | ACEI-ARB-Control               | 1.94 (0.00,4.87)                     | 0.00                                            | 0.20                                   | 0.0 (low heterogeneity)                            |

|                                |                   |   |      |        |                         |
|--------------------------------|-------------------|---|------|--------|-------------------------|
| <b>adverse event</b>           | ACEI-ARB-ACEI+ARB | . | 0.00 |        |                         |
| <b>Hypotension</b>             | no closed loops   | - | -    | 0.64   | 0.0 (low heterogeneity) |
| <b>Hyperkalaemia</b>           | no closed loops   | - | -    | 0.22   | 0.0 (low heterogeneity) |
| <b>Potassium concentration</b> | no closed loops   | - | -    | <0.001 | 0.0 (low heterogeneity) |

Aldosterone antagonists vs. placebo comparison did not form a closed loop of evidence and all the evidence for this comparison come from aldosterone antagonists vs. placebo trials, i.e. no indirect evidence was calculated for this comparison. ACEI = angiotensin-converting enzyme inhibitors. ARB = angiotensin receptor blockers. BB =  $\beta$  blockers. CCB = calcium channel blockers.

**Supplemental Table 5. Assessment of agreement between direct and indirect evidence using side-splitting approach for all outcomes.**

| <b>Outcome</b>                  | <b>Side</b>                           | <b>Direct estimates</b> | <b>Standard error</b> | <b>Indirect estimates</b> | <b>Standard error.</b> | <b>Difference</b> | <b>Standard error.</b> | <b>P value</b> |
|---------------------------------|---------------------------------------|-------------------------|-----------------------|---------------------------|------------------------|-------------------|------------------------|----------------|
| <b>Systolic blood pressure</b>  | ACEI-Placebo                          | 4.01186                 | 1.887974              | 4.748869                  | 2.286428               | -0.73701          | 2.965164               | 0.80           |
|                                 | ACEI-ARB                              | 1.894487                | 4.820632              | 0.89501                   | 3.818895               | 0.999477          | 6.149051               | 0.87           |
|                                 | ACEI- $\beta$ blockers                | -4.70139                | 2.58363               | -4.18304                  | 1.923293               | -0.51835          | 3.220966               | 0.87           |
|                                 | ACEI-CCB                              | 1.343631                | 3.290392              | -0.82741                  | 1.836203               | 2.17104           | 3.768251               | 0.57           |
|                                 | ARB-Placebo                           | -1.63793                | 5.115792              | 5.187827                  | 3.477899               | -6.82575          | 6.186041               | 0.27           |
|                                 | ARB-CCB                               | 0.300003                | 4.822033              | -2.60319                  | 3.524782               | 2.903196          | 5.972946               | 0.63           |
|                                 | ARB-Renin inhibitors                  | 10.59749                | 3.362012              | 4.824083                  | 5.417452               | 5.773405          | 6.375496               | 0.37           |
|                                 | $\alpha$ blockers- $\beta$ blockers * | -2                      | 3.609678              | -15.3588                  | 200.0456               | 13.35879          | 200.1433               | 0.95           |
|                                 | $\beta$ blockers-Placebo              | 8.852225                | 1.53188               | 8.457964                  | 1.726304               | 0.394261          | 2.307983               | 0.86           |
|                                 | $\beta$ blockers-CCB                  | 3.89945                 | 1.130249              | 4.568475                  | 2.05124                | -0.66902          | 2.341872               | 0.78           |
|                                 | CCB-Placebo                           | 5.436714                | 2.128656              | 3.600421                  | 2.495653               | 1.836293          | 3.558225               | 0.61           |
|                                 | CCB-Renin inhibitors                  | 7.998312                | 4.262446              | 13.78184                  | 4.73911                | -5.78353          | 6.372505               | 0.36           |
| ALDO-Placebo                    | .                                     | .                       | .                     | .                         | .                      | .                 | .                      |                |
| <b>Diastolic blood pressure</b> | ACEI-Placebo                          | 0.848348                | 1.921043              | 2.544202                  | 2.229023               | -1.69585          | 2.942216               | 0.56           |
|                                 | ACEI-ARB                              | -0.40164                | 5.355629              | -0.16529                  | 3.119034               | -0.23635          | 6.197074               | 0.97           |
|                                 | ACEI- $\beta$ blockers                | -1.70027                | 2.527595              | -3.8482                   | 2.427576               | 2.147928          | 3.504563               | 0.54           |
|                                 | ACEI-CCB                              | -0.80711                | 2.666879              | -0.96117                  | 3.055745               | 0.154064          | 4.049435               | 0.97           |
|                                 | ARB-Placebo                           | 1.364134                | 3.55327               | 2.173941                  | 3.828507               | -0.80981          | 5.189358               | 0.88           |
|                                 | ARB-CCB                               | -1.8                    | 5.34946               | -0.24237                  | 3.124403               | -1.55762          | 6.195047               | 0.80           |
|                                 | ARB-Renin inhibitors                  | 5.59959                 | 2.847764              | 3.783104                  | 5.155734               | 1.816486          | 5.889747               | 0.76           |

|                                              |                                       |          |          |          |          |          |          |       |
|----------------------------------------------|---------------------------------------|----------|----------|----------|----------|----------|----------|-------|
|                                              | $\alpha$ blockers- $\beta$ blockers * | -1       | 3.441318 | -7.80411 | 200.0688 | 6.80411  | 200.1383 | 0.97  |
|                                              | $\beta$ blockers-Placebo              | 4.873786 | 1.555929 | 2.722145 | 3.090398 | 2.151641 | 3.501714 | 0.54  |
|                                              | CCB-Placebo                           | 2.869727 | 3.102839 | 2.038153 | 2.770071 | 0.831574 | 4.024667 | 0.84  |
|                                              | CCB-Renin inhibitors                  | 4.999044 | 3.977951 | 6.822081 | 4.343092 | -1.82304 | 5.888967 | 0.76  |
|                                              | ALDO-Placebo                          | .        | .        | .        | .        | .        | .        | .     |
| <b>Heart rate</b>                            | ACEI-Placebo                          | -5.88078 | 2.352137 | 0.651982 | 2.261786 | -6.53277 | 3.263162 | 0.045 |
|                                              | ACEI-ARB                              | -2.09945 | 2.558684 | -8.26061 | 2.219672 | 6.161154 | 3.38747  | 0.069 |
|                                              | ACEI-CCB                              | -0.66272 | 2.143051 | -7.34159 | 3.911949 | 6.678876 | 4.47188  | 0.14  |
|                                              | ARB-Placebo                           | 3.033585 | 1.952983 | -0.53574 | 3.47376  | 3.569329 | 3.95103  | 0.37  |
|                                              | ARB-CCB                               | 2.700005 | 3.589857 | 3.123915 | 3.677171 | -0.42391 | 5.138935 | 0.93  |
|                                              | $\beta$ blockers-Placebo              | 20.62708 | 2.892543 | 19.13711 | 6.629586 | 1.489967 | 7.15432  | 0.84  |
|                                              | $\beta$ blockers-CCB                  | 20.16617 | 6.206428 | 21.608   | 3.58629  | -1.44183 | 7.168406 | 0.84  |
|                                              | CCB-Placebo                           | 1        | 3.998048 | -1.82377 | 2.884053 | 2.823767 | 4.929721 | 0.57  |
|                                              | CentralAct-Placebo                    | .        | .        | .        | .        | .        | .        | .     |
| <b>Discontinuation due to adverse events</b> | ACEI-Control                          | -0.51677 | 0.250801 | -2.45176 | 1.477647 | 1.934993 | 1.49878  | 0.20  |
|                                              | ACEI-ARB *                            | -1.94575 | 1.455656 | -0.01038 | 0.357449 | -1.93537 | 1.498901 | 0.20  |
|                                              | ACEI-ACEI+ARB *                       | -0.84725 | 0.886403 | 3.022737 | 2.993614 | -3.86999 | 2.997559 | 0.20  |
|                                              | ARB-Control                           | -0.50638 | 0.254693 | 1.429147 | 1.477142 | -1.93553 | 1.498939 | 0.20  |
|                                              | ARB-ACEI+ARB *                        | 1.098612 | 1.581139 | -2.77245 | 1.954636 | 3.871062 | 2.997877 | 0.20  |

\*All evidence for these comparisons comes from trials that directly compare them. . = missing values indicate only direct evidence existed and inconsistency between direct and indirect evidence could not be assessed. ACEI = angiotensin-converting enzyme inhibitors. ALDO = aldosterone antagonists. ARB = angiotensin receptor blockers. CCB = calcium channel blockers. CentralAct = centrally acting vasodilators.

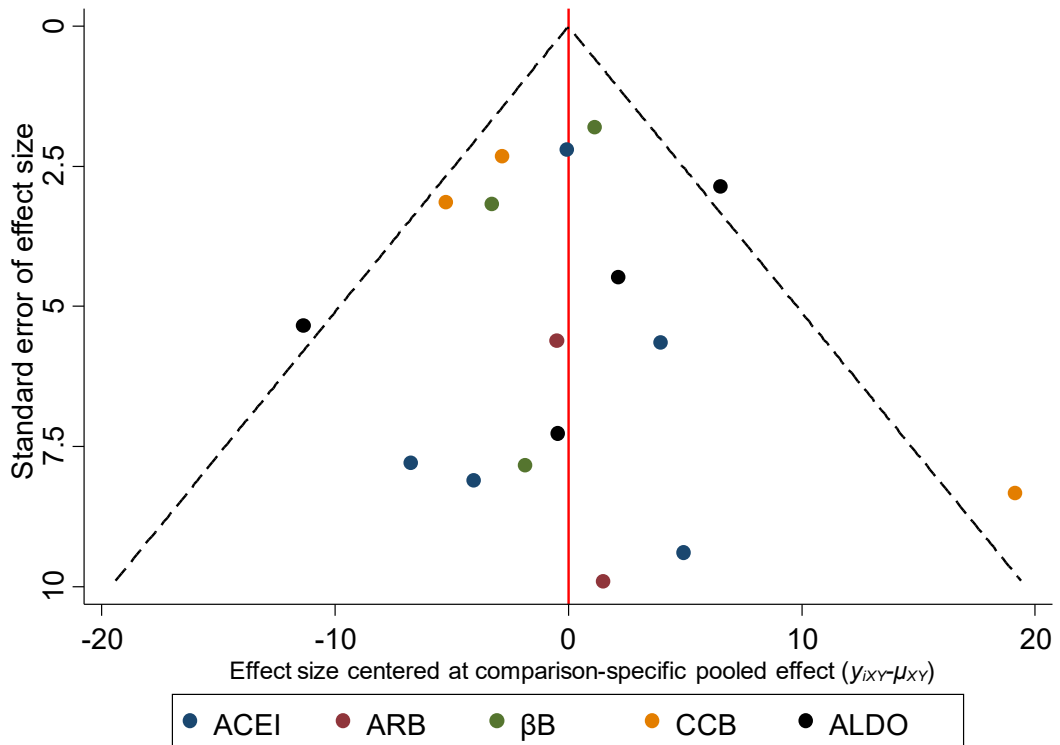

**Supplemental Figure 4. Comparison-adjusted funnel plot of placebo-controlled trials (n=17) of blood pressure lowering drugs effect on systolic blood pressure in dialysis patients.**

Each point represents the difference between the trial-specific effect size and its respective comparison-specific summary effect. ACEI= angiotensin converting enzyme inhibitors. ARB= angiotensin receptor blockers.  $\beta$ B=  $\beta$  blockers. CCB= calcium channel blockers. ALDO= aldosterone antagonists.



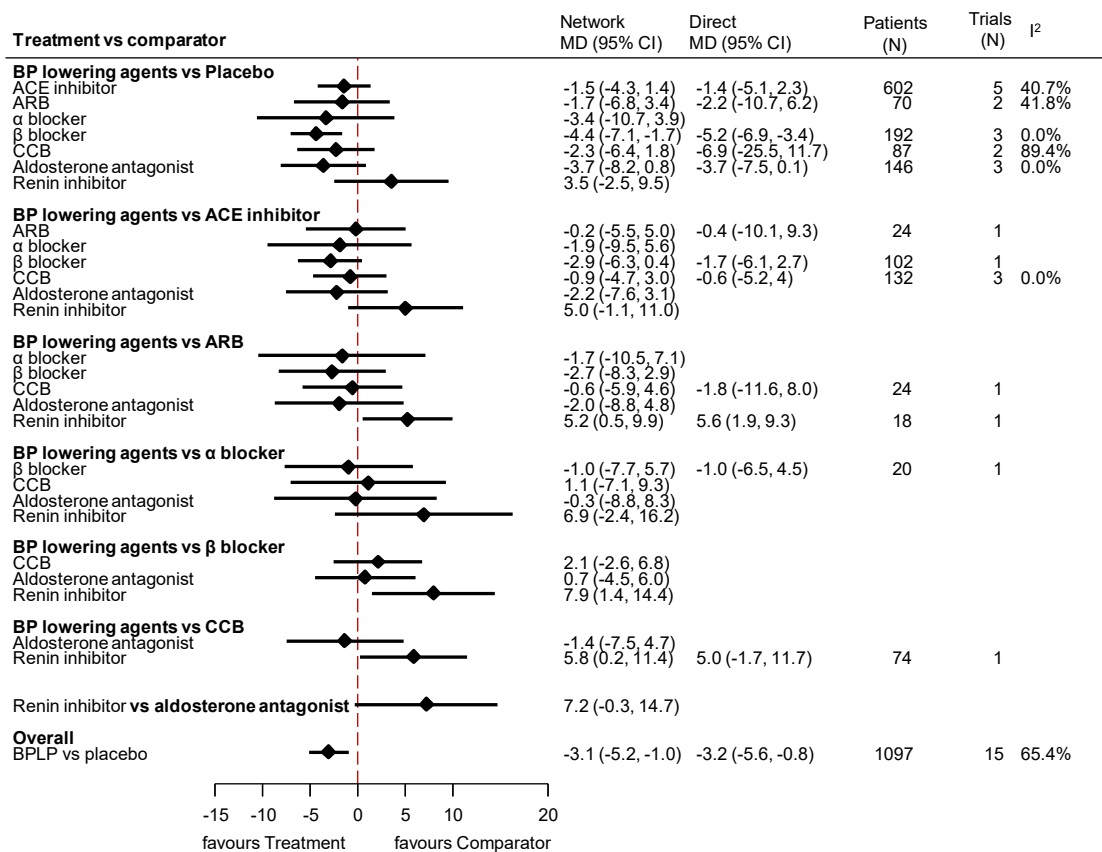

**Supplemental Figure 5. Network estimates of blood pressure lowering drugs effects on diastolic blood pressure.**

BP= blood pressure. ACE= angiotensin converting enzyme. ARB= angiotensin receptor blockers. CCB= calcium-channel blockers. MD= mean difference (mmHg). BPLP= blood pressure lowering pharmacotherapy

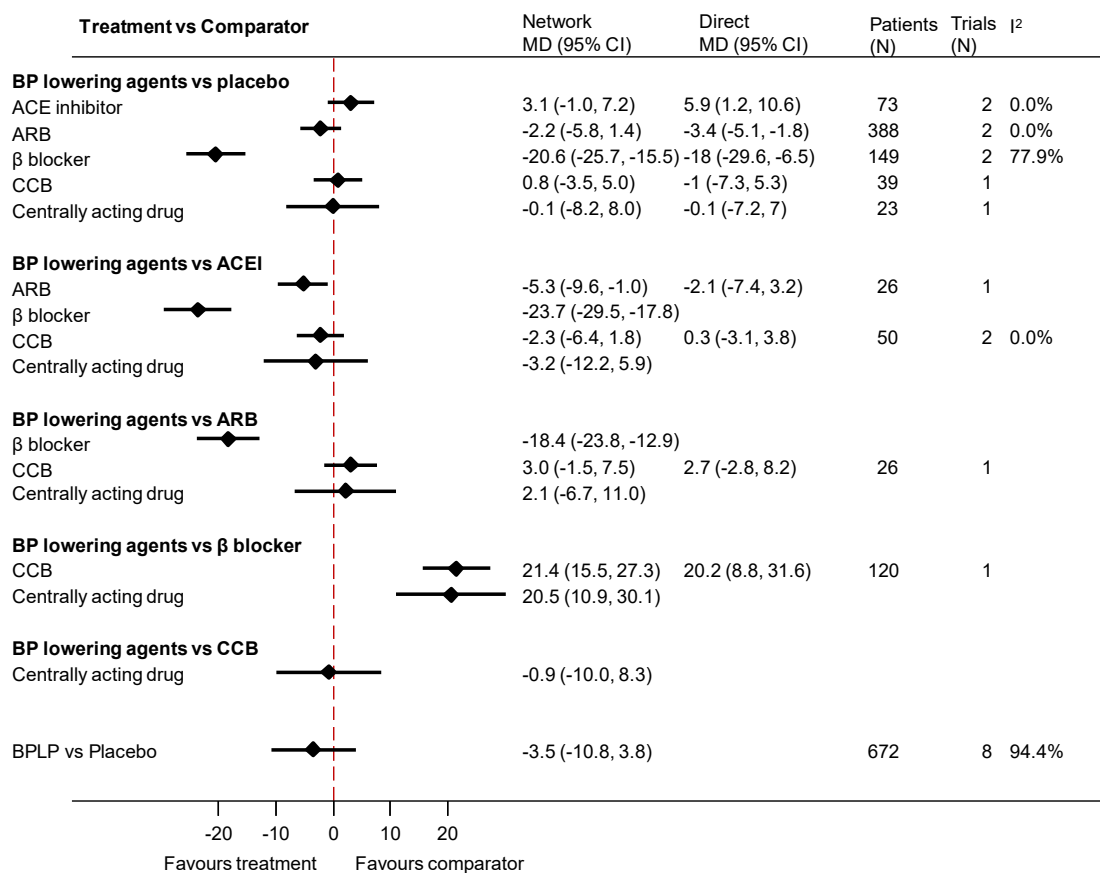

**Supplemental Figure 6. Network estimates of blood pressure lowering drugs effects on heart rate.**

BP= blood pressure. ACE= angiotensin converting enzyme. ARB= angiotensin receptor blockers. CCB= calcium-channel blockers. MD= mean difference (beats per minute). BPLP= blood pressure lowering pharmacotherapy.

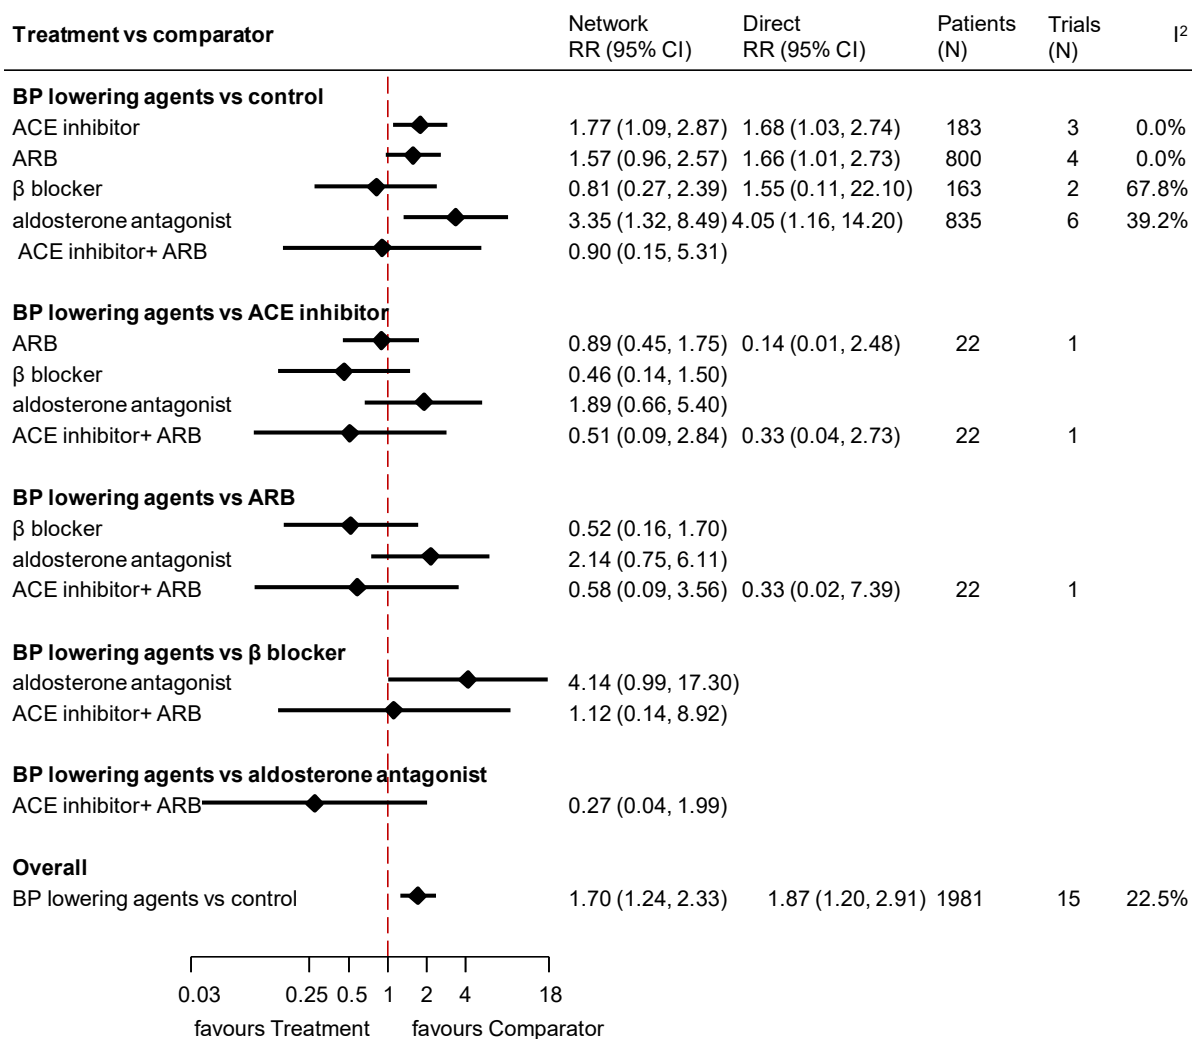

**Supplemental Figure 7. Network estimates of blood pressure lowering drugs effects on discontinuation due to adverse events.**

BP= blood pressure. ACE= angiotensin converting enzyme. ARB= angiotensin receptor blockers. CCB= calcium-channel blockers. RR= relative risk.

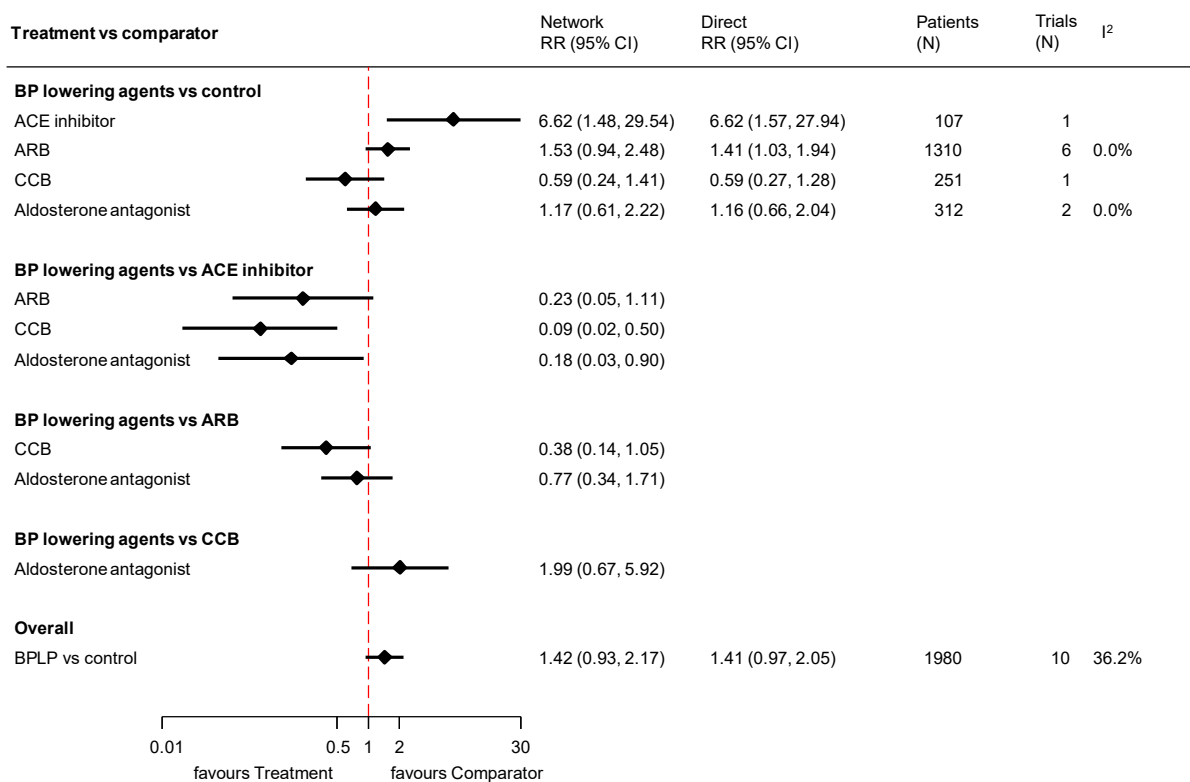

**Supplemental Figure 8. Network estimates of blood pressure lowering drugs effects on risk of hypotension.**

ACE= angiotensin converting enzyme. ARB= angiotensin receptor blockers. BP= blood pressure. BPLP= blood pressure lowering pharmacotherapy. CCB= calcium-channel blockers. RR= relative risk.

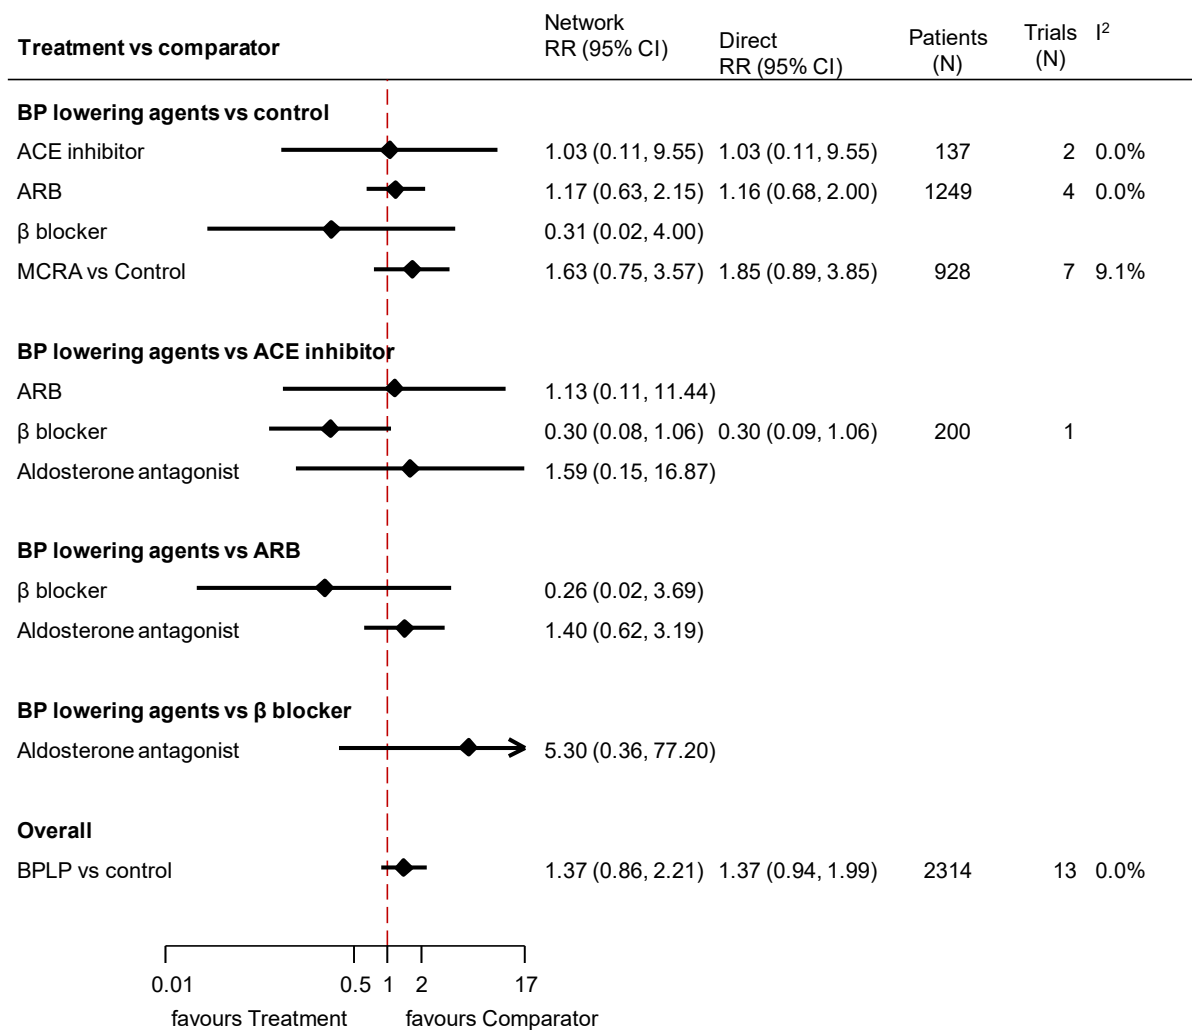

**Supplemental Figure 9. Network estimates of blood pressure lowering drugs effects on the risk of hyperkalaemia.**

ACE= angiotensin converting enzyme. ARB= angiotensin receptor blockers. BP= blood pressure. BPLP= blood pressure lowering pharmacotherapy. CCB= calcium-channel blockers. RR= relative risk.

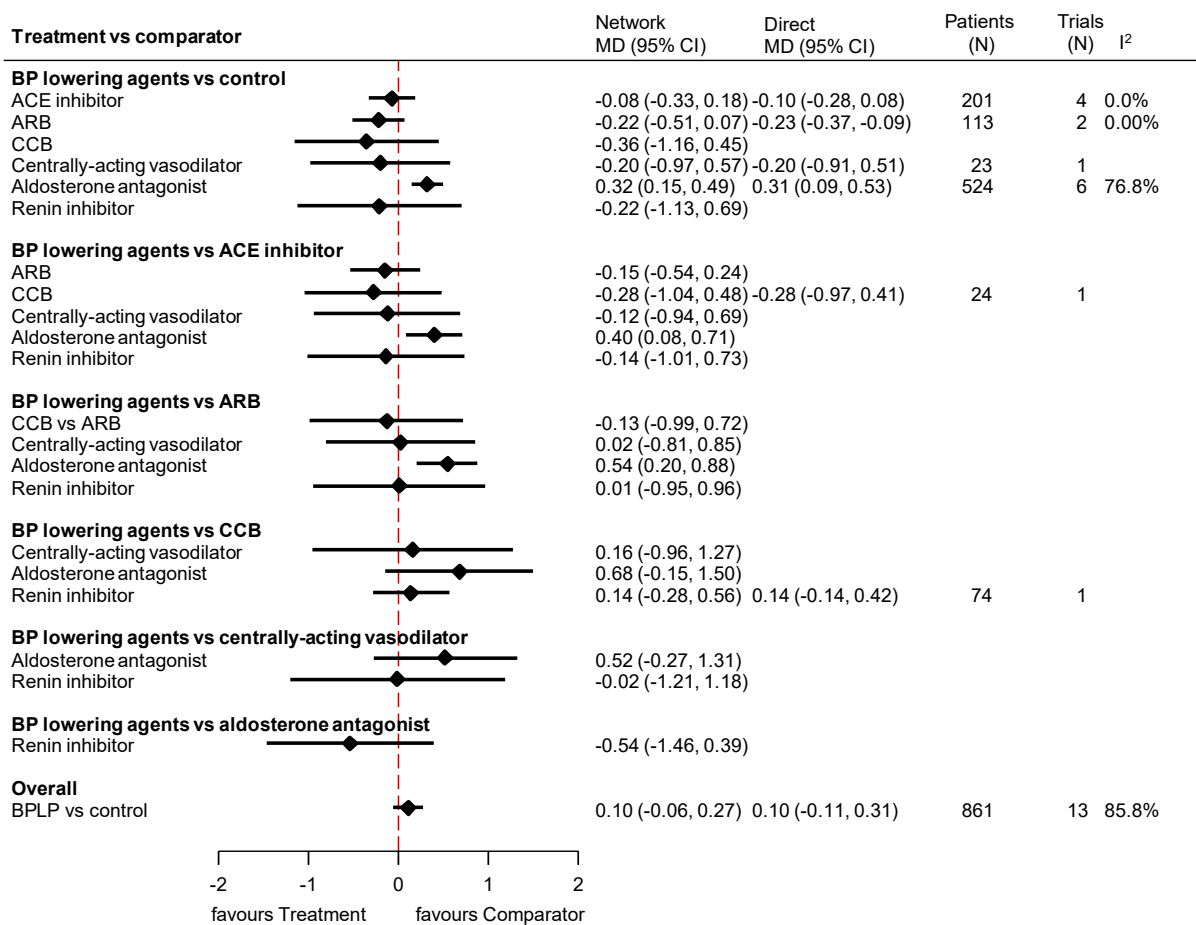

**Supplemental Figure 10. Network estimates of blood pressure lowering drugs effects on serum potassium.**

ACE= angiotensin converting enzyme. ARB= angiotensin receptor blockers. BP= blood pressure. BPLP= blood pressure lowering pharmacotherapy. CCB= calcium-channel blockers. MD= mean difference (mEq/L).

### Diastolic blood pressure

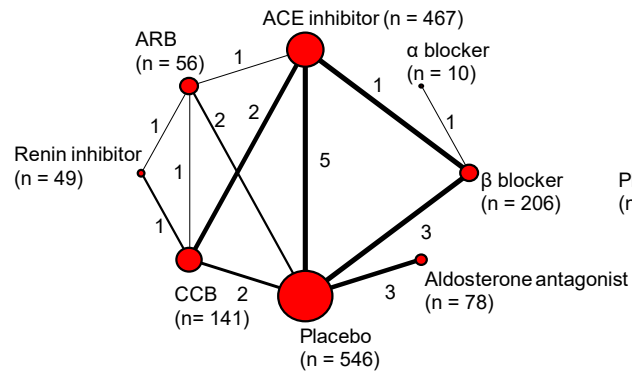

### Heart rate

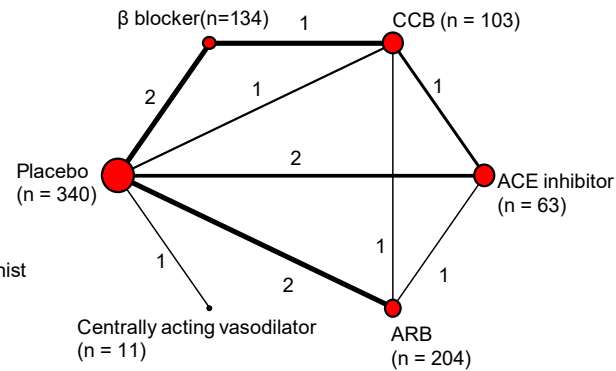

### Potassium concentration

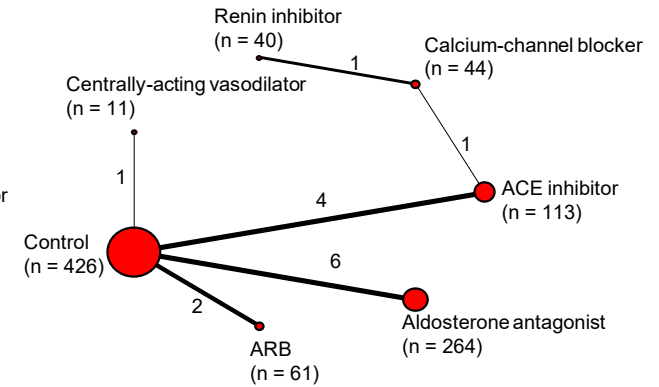

**Supplemental Figure 11. Network of treatment comparison of blood pressure lowering agents effects on diastolic blood pressure, heart rate and potassium concentration outcomes.**

The size of the node corresponds to the number of trials. The thickness of the line connecting two treatments corresponds to the number of patients. Numbers next to each line represent the number of trials that compared the connected treatments. Numbers in brackets correspond to the number of patients. ACE= angiotensin converting enzyme. ARB= angiotensin receptor blockers. CCB= calcium-channel blockers.

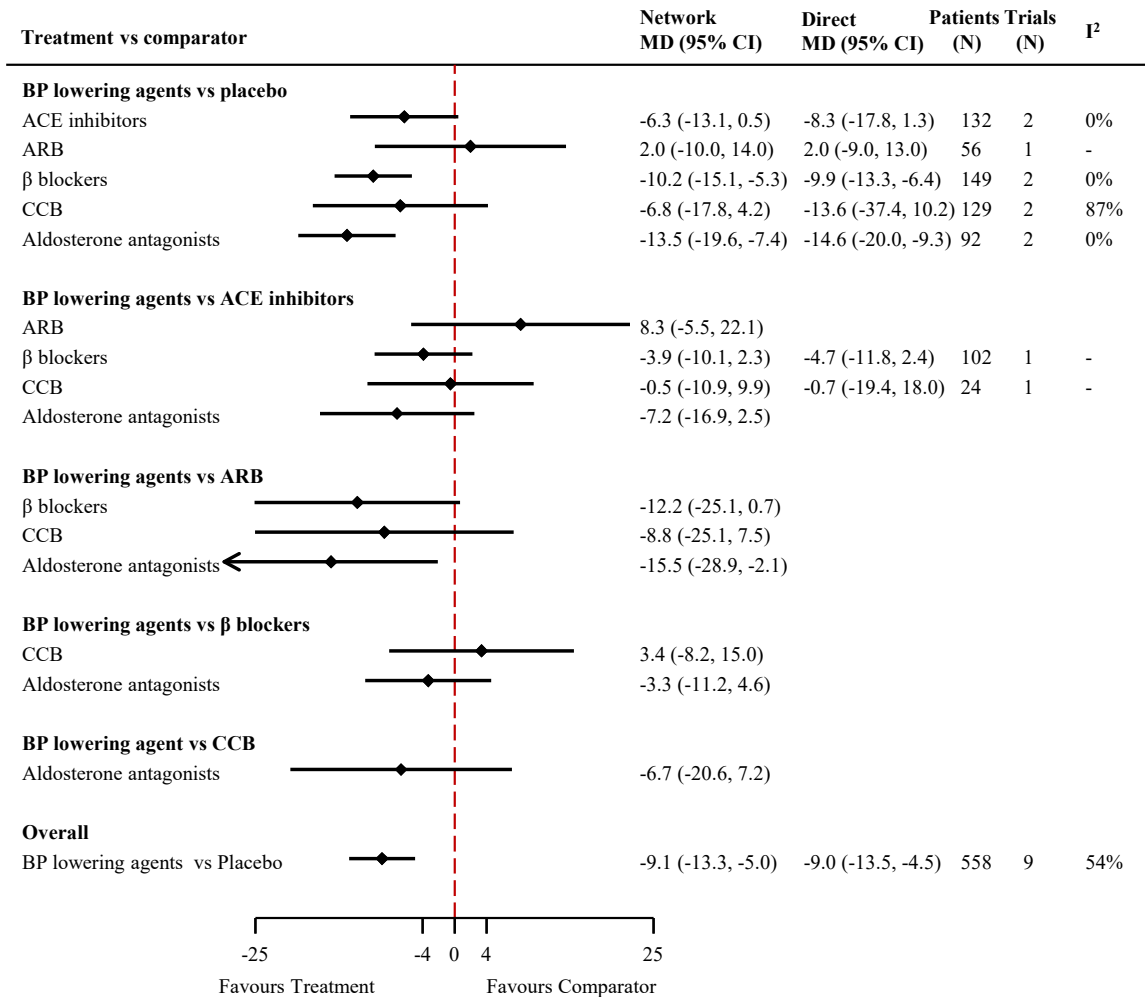

**Supplemental Figure 12. Network estimates of blood pressure lowering drugs effects on systolic blood pressure in trials with low risk of bias (n=9).**

BP= blood pressure. ACE= angiotensin converting enzyme. ARB= angiotensin receptor blockers. CCB= calcium-channel blockers. MD= mean difference (mmHg).



## Supplemental References

1. London GM, Pannier B, Guerin AP, Marchais SJ, Safar ME, Cuche J-L: Cardiac hypertrophy, aortic compliance, peripheral resistance, and wave reflection in end-stage renal disease. Comparative effects of ACE inhibition and calcium channel blockade. *Circulation*, 90: 2786-2796, 1994
2. Robson R, Collins J, Johnson R, Kitching R, Searle M, Walker R, Douglas J, Leary J, Whalley G, Sharpe N: Effects of simvastatin and enalapril on serum lipoprotein concentrations and left ventricular mass in patients on dialysis. The Perfect Study Collaborative Group. *Journal of nephrology*, 10: 33-40, 1997
3. Nakamoto H, Kanno Y, Okada H, Suzuki H: Erythropoietin resistance in patients on continuous ambulatory peritoneal dialysis. *Adv Perit Dial*, 20: 111-116, 2004
4. Suzuki H, Kanno Y, Kaneko K, Kaneko M, Kotaki S, Mimura T, Takane H: Comparison of the effects of angiotensin receptor antagonist, angiotensin converting enzyme inhibitor, and their combination on regression of left ventricular hypertrophy of diabetes type 2 patients on recent onset hemodialysis therapy. *Therapeutic Apheresis and Dialysis*, 8: 320-327, 2004
5. Matsumoto N, Ishimitsu T, Okamura A, Seta H, Takahashi M, Matsuoka H: Effects of imidapril on left ventricular mass in chronic hemodialysis patients. *Hypertension research*, 29: 253, 2006
6. Yu W-C, Lin Y-P, Lin I-F, Chuang S-Y, Chen C-H: Effect of ramipril on left ventricular mass in normotensive hemodialysis patients. *American journal of kidney diseases*, 47: 478-484, 2006
7. Zannad F, Kessler M, Leheret P, Grünfeld J, Thuilliez C, Leizorovicz A, Lechat P, Investigators F: Prevention of cardiovascular events in end-stage renal disease: results of a randomized trial of fosinopril and implications for future studies. *Kidney international*, 70: 1318-1324, 2006
8. Ordaz-Medina SM, González-Plascencia J, del Campo FM, Rojas-Campos E, Montañez-Fernández JL, Espinoza-Gómez F, Cueto-Manzano AM: Is systemic inflammation of hemodialysis patients improved with the use of enalapril? Results of a randomized, double-blinded, placebo-controlled clinical trial. *ASAIO Journal*, 56: 37-41, 2010
9. Yilmaz R, Altun B, Kahraman S, Ozer N, Akinci D, Turgan C: Impact of amlodipine or ramipril treatment on left ventricular mass and carotid intima-media thickness in nondiabetic hemodialysis patients. *Renal failure*, 32: 903-912, 2010

10. Reyes-Marín FA, Calzada C, Ballesteros A, Amato D: Comparative study of enalapril vs. losartan on residual renal function preservation in automated peritoneal dialysis. A randomized controlled study. *Rev Invest Clin*, 64: 315-321, 2012
11. Ottosson P, Attman P-O, Ågren A-C, Samuelsson O: Candesartan cilexetil in haemodialysis patients. *Clinical drug investigation*, 23: 545-550, 2003
12. Suzuki H, Kanno Y, Sugahara S, Ikeda N, Shoda J, Takenaka T, Inoue T, Araki R: Effect of angiotensin receptor blockers on cardiovascular events in patients undergoing hemodialysis: an open-label randomized controlled trial. *American Journal of Kidney Diseases*, 52: 501-506, 2008
13. Cice G, Di Benedetto A, D'Isa S, D'Andrea A, Marcelli D, Gatti E, Calabrò R: Effects of telmisartan added to angiotensin-converting enzyme inhibitors on mortality and morbidity in hemodialysis patients with chronic heart failure: a double-blind, placebo-controlled trial. *Journal of the American College of Cardiology*, 56: 1701-1708, 2010
14. Iseki K, Arima H, Kohagura K, Komiya I, Ueda S, Tokuyama K, Shiohira Y, Uehara H, Toma S, Group OCTiOPUO: Effects of angiotensin receptor blockade (ARB) on mortality and cardiovascular outcomes in patients with long-term haemodialysis: a randomized controlled trial. *Nephrology Dialysis Transplantation*, 28: 1579-1589, 2013
15. Peters CD, Kjaergaard KD, Jensen JD, Christensen KL, Strandhave C, Tietze IN, Novosel MK, Bibby BM, Jensen LT, Sloth E: No significant effect of angiotensin II receptor blockade on intermediate cardiovascular end points in hemodialysis patients. *Kidney international*, 86: 625-637, 2014
16. Satirapoj B, Leelasiri K, Supasyndh O, Choovichian P: Short-term administration of an angiotensin II receptor blocker in patients with long-term hemodialysis patients improves insulin resistance. *J Med Assoc Thai*, 97: 574-581, 2014
17. Sun F, Song Y, Liu J, Ma LJ, Shen Y, Huang J, Zhou YL: Efficacy of losartan for improving insulin resistance and vascular remodeling in hemodialysis patients. *Hemodialysis International*, 20: 22-30, 2016
18. Meltzer VN, Goldberg AP, Tindira CA, Naumovich AD, Harter HR: Effects of prazosin and propranolol on blood pressure and plasma lipids in patients undergoing chronic hemodialysis. *Am J Cardiol*, 53: 40A-45A, 1984

19. Cice G, Di AB, Tagliamonte E, Ferrara L, Sorice P, Iacono A: Effectiveness and tolerability of bisoprolol vs. nifedipine in uremic patients with ischemic cardiopathy in dialysis treatment. *Cardiologia (Rome, Italy)*, 42: 397-403, 1997
20. Cice G, Tagliamonte E, Ferrara L, Di AB, Iacono A: Complex ventricular arrhythmias and carvedilol: efficacy in hemodialyzed uremic patients. *Cardiologia (Rome, Italy)*, 43: 597-604, 1998
21. Cice G, Ferrara L, Di Benedetto A, Russo PE, Marinelli G, Pavese F, Iacono A: Dilated cardiomyopathy in dialysis patients--beneficial effects of carvedilol: a double-blind, placebo-controlled trial. *J Am Coll Cardiol*, 37: 407-411, 2001
22. Agarwal R, Sinha AD, Pappas MK, Abraham TN, Tegegne GG: Hypertension in hemodialysis patients treated with atenolol or lisinopril: a randomized controlled trial. *Nephrology Dialysis Transplantation*, 29: 672-681, 2014
23. Roberts MA, Pilmore HL, Ierino FL, Badve SV, Cass A, Garg AX, Isbel NM, Krum H, Pascoe EM, Perkovic V: The  $\beta$ -Blocker to Lower Cardiovascular Dialysis Events (BLOCADE) feasibility study: a randomized controlled trial. *American Journal of Kidney Diseases*, 67: 902-911, 2016
24. London GM, Marchais SJ, Guerin AP, Metivier F, Safar ME, Fabiani F, Froment L: Salt and water retention and calcium blockade in uremia. *Circulation*, 82: 105-113, 1990
25. Cice G, Tagliamonte E, Ferrara L, Di AB, Sorice P, Iacono A: Efficacy of diltiazem in uremic hemodialyzed patients with isolated diastolic dysfunction and dialysis hypotensive crisis. *Cardiologia (Rome, Italy)*, 44: 289-294, 1999
26. Tepel M, Hopfenmueller W, Scholze A, Maier A, Zidek W: Effect of amlodipine on cardiovascular events in hypertensive haemodialysis patients. *Nephrology Dialysis Transplantation*, 23: 3605-3612, 2008
27. Hausberg M, Tokmak F, Pavenstädt H, Krämer BK, Rump LC: Effects of moxonidine on sympathetic nerve activity in patients with end-stage renal disease. *Journal of hypertension*, 28: 1920-1927, 2010
28. Gross E, Rothstein M, Dombek S, Juknis HI: Effect of spironolactone on blood pressure and the renin-angiotensin-aldosterone system in oligo-anuric hemodialysis patients. *American journal of kidney diseases*, 46: 94-101, 2005
29. Taheri S, Mortazavi M, Shahidi S, Pourmoghadas A, Garakyaraghi M, Seirafian S, Eshaghian A, Ghassami M: Spironolactone in chronic hemodialysis patients

- improves cardiac function. *Saudi Journal of Kidney Diseases and Transplantation*, 20: 392, 2009
30. Vukusich A, Kunstmann S, Varela C, Gainza D, Bravo S, Sepulveda D, Cavada G, Michea L, Marusic ET: A randomized, double-blind, placebo-controlled trial of spironolactone on carotid intima-media thickness in nondiabetic hemodialysis patients. *Clinical Journal of the American Society of Nephrology: CJN*. 09421209, 2010
  31. Taheri S, Mortazavi M, Pourmoghadas A, Seyrafian S, Alipour Z, Karimi S: A prospective double-blind randomized placebo-controlled clinical trial to evaluate the safety and efficacy of spironolactone in patients with advanced congestive heart failure on continuous ambulatory peritoneal dialysis. *Saudi Journal of Kidney Diseases and Transplantation*, 23: 507, 2012
  32. Зарипова И, Есаян А, Нимгирова А, Каюков И: Динамика концентрации калия в сыворотке крови на фоне «Трехкомпонентной» и «Двухкомпонентной» фармакологической блокады ренин\_ангиотензин\_альдостероновой системы у больных на постоянном гемодиализе. *Нефрология*, 15, 2011
  33. Matsumoto Y, Mori Y, Kageyama S, Arihara K, Sugiyama T, Ohmura H, Yakushigawa T, Sugiyama H, Shimada Y, Nojima Y: Spironolactone reduces cardiovascular and cerebrovascular morbidity and mortality in hemodialysis patients. *Journal of the American College of Cardiology*, 63: 528-536, 2014
  34. Ni X, Zhang J, Zhang P, Wu F, Xia M, Ying G, Chen J: Effects of spironolactone on dialysis patients with refractory hypertension: a randomized controlled study. *The Journal of Clinical Hypertension*, 16: 658-663, 2014
  35. Feniman-De-Stefano GMM, Zanati-Basan SG, De Stefano LM, Xavier PS, Castro AD, Caramori JCT, Barretti P, Jorge da Silva Franco R, Martin LC: Spironolactone is secure and reduces left ventricular hypertrophy in hemodialysis patients. *Therapeutic advances in cardiovascular disease*, 9: 158-167, 2015
  36. Ito Y, Mizuno M, Suzuki Y, Tamai H, Hiramatsu T, Ohashi H, Ito I, Kasuga H, Horie M, Maruyama S: Long-term effects of spironolactone in peritoneal dialysis patients. *Journal of the American Society of Nephrology: ASN*. 2013030273, 2013
  37. Walsh M, Manns B, Garg AX, Bueti J, Rabbat C, Smyth A, Tyrwhitt J, Bosch J, Gao P, Devereaux P: The safety of eplerenone in hemodialysis patients: a noninferiority randomized controlled trial. *Clinical Journal of the American Society of Nephrology: CJN*. 12371214, 2015

38. Lin C, Zhang Q, Zhang H, Lin A: Long-term effects of low-dose spironolactone on chronic dialysis patients: a randomized placebo-controlled study. *The Journal of Clinical Hypertension*, 18: 121-128, 2016
39. Ito T, Ishikawa E, Fujimoto N, Okubo S, Ito G, Ichikawa T, Nomura S, Ito M: Effects of aliskiren on blood pressure and humoral factors in hypertensive hemodialysis patients previously on angiotensin II receptor antagonists. *Clinical and Experimental Hypertension*, 36: 497-502, 2014
40. Kuriyama S, Yokoyama K, Hara Y, Sugano N, Yokoo T, Hosoya T: Effect of aliskiren in chronic kidney disease patients with refractory hypertension undergoing hemodialysis: a randomized controlled multicenter study. *Clinical and experimental nephrology*, 18: 821-830, 2014
